# Supplementary material for: The rubber tree genome shows expansion of gene family associated with rubber biosynthesis
Source: PubMed Central journal article supplement (PMC5008842; doi:10.1038/srep28594), 2016-06-24
Supplement: srep28594-s1.pdf [file srep28594-s1.pdf]

# **The rubber tree genome shows expansion of gene family associated with rubber biosynthesis**

Nyok-Sean Lau<sup>1,2</sup>, Yuko Makita<sup>2</sup>, Mika Kawashima<sup>2</sup>, Todd D. Taylor<sup>3</sup>, Shinji Kondo<sup>4</sup>, Ahmad Sofiman Othman<sup>1,5</sup>, Alexander Chong Shu-Chien<sup>1,5,\*</sup>, Minami Matsui<sup>2,\*</sup>

<sup>1</sup> Centre for Chemical Biology, Universiti Sains Malaysia, Bayan Lepas, Penang, Malaysia.

<sup>2</sup> Synthetic Genomics Research Group, RIKEN Center for Sustainable Resource Science, Biomass Engineering Research Division, Tsurumi, Yokohama, Kanagawa, Japan.

<sup>3</sup> Laboratory for Integrated Bioinformatics, RIKEN Center for Integrative Medical Sciences, Tsurumi, Yokohama, Japan.

<sup>4</sup> Transdisciplinary Research Integration Center, National Institute of Polar Research, Tokyo, Japan.

<sup>5</sup> School of Biological Sciences, Universiti Sains Malaysia, Minden, Penang, Malaysia.

\*Correspondence: alex@usm.my; minami@riken.jp

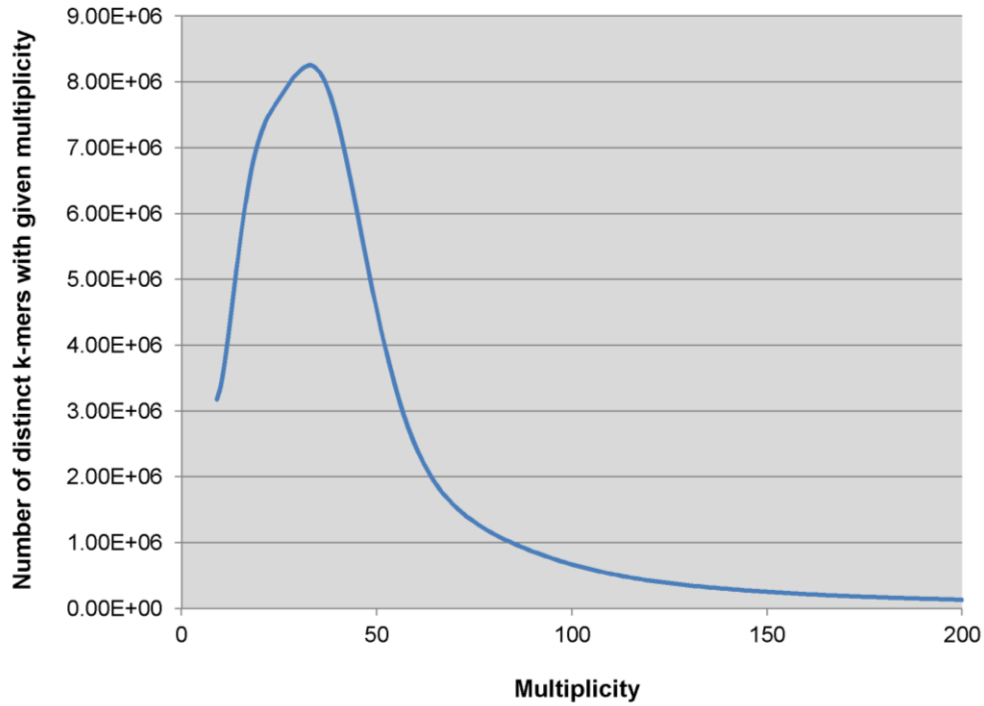

**Supplementary Figure 1. Distribution of 17-mer frequency in the *H. brasiliensis* genome sequencing reads.** The frequency of each 17-mer was calculated based on the preprocessed paired-end Illumina reads with insert size of 500 bp. The genome size was estimated as  $(N \times (L - K + 1) - B) / D = G$ , where N is the total number of sequence reads, L is the length of the sequence reads, K is the K-mer length, B is the total number of low-frequency (frequency  $\leq 1$ ) K-mers, G is the genome size and D is the K-mer depth.

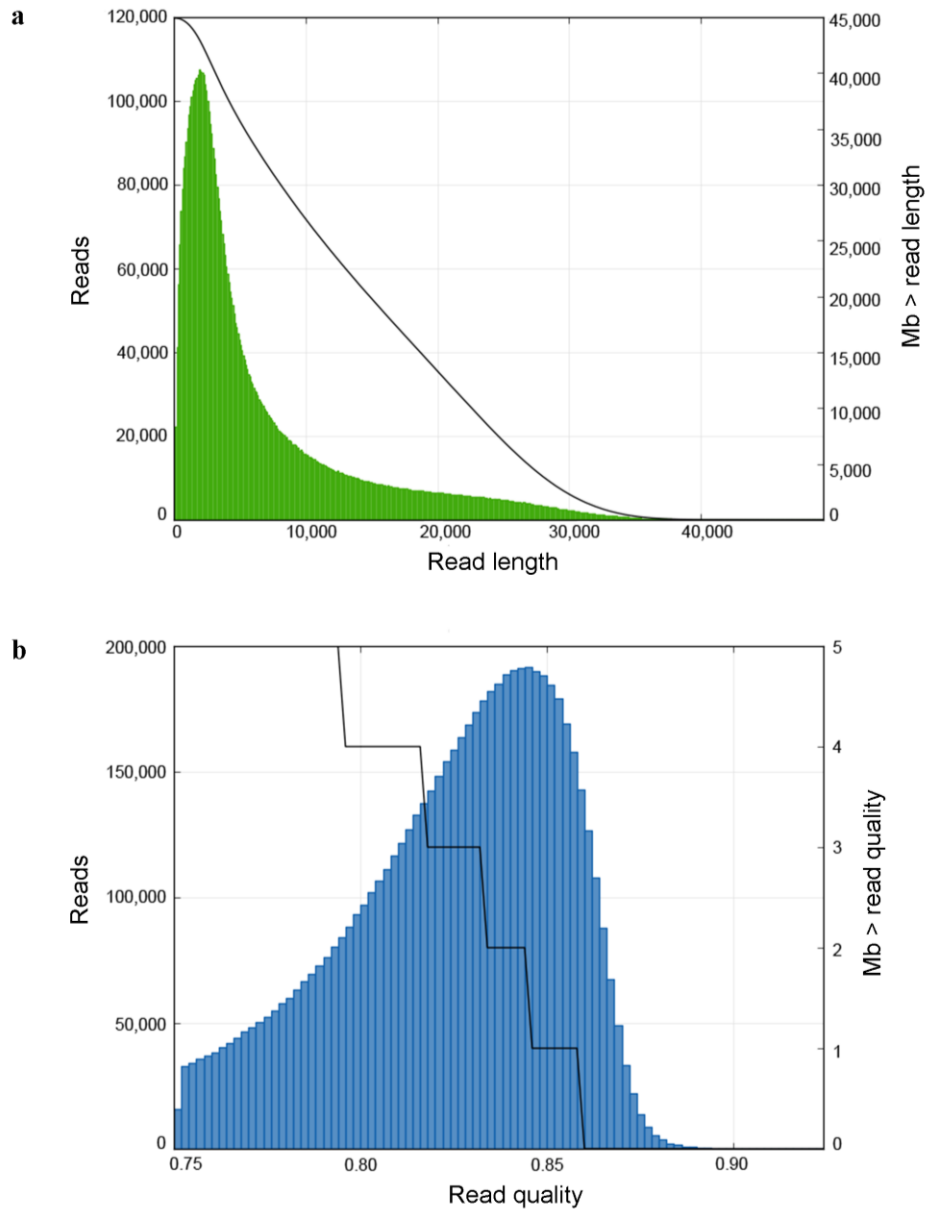

**Supplementary Figure 2. (a) Length and (b) quality distribution of PacBio reads. 100 SMRT Cell runs generated 6,603,402 reads with an average length of 6.8 Kb totalling 45.25 Gb data.**

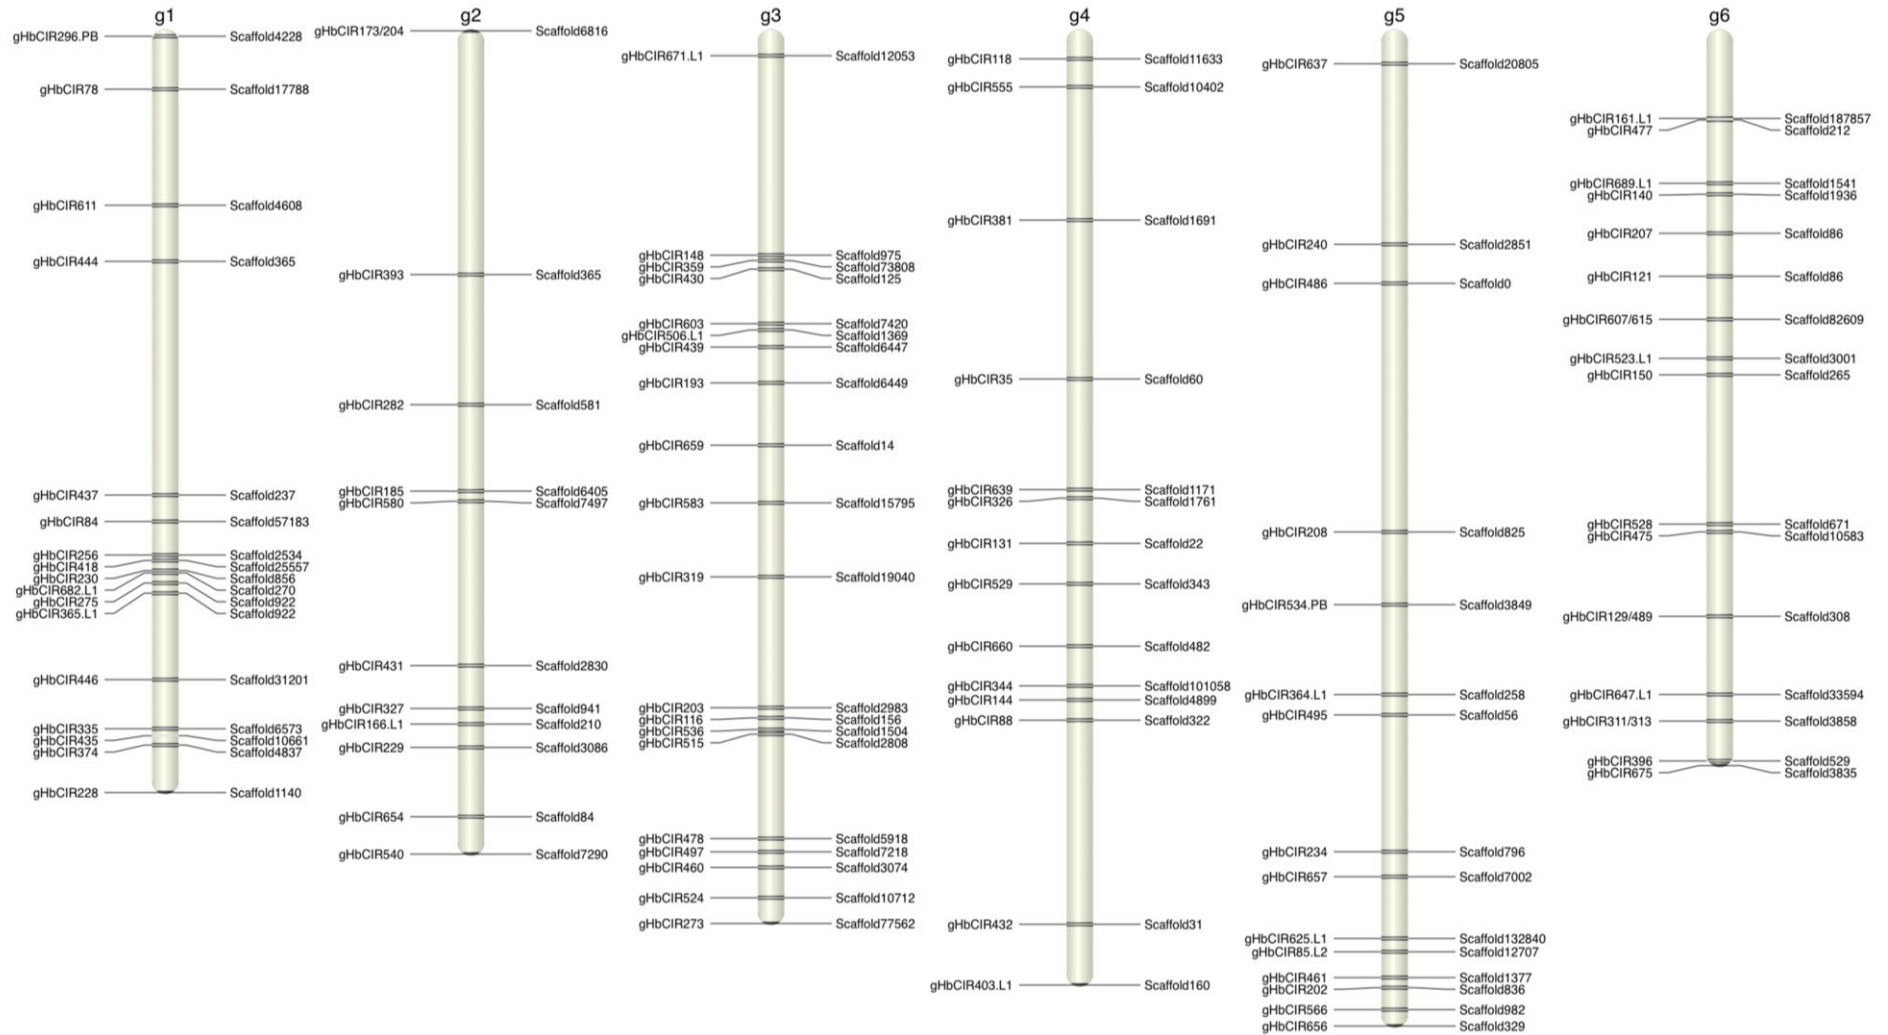

**Supplementary Figure 3. Anchoring the genome assembly to the linkage groups of *H. brasiliensis*.** 196 RFLP markers from the published genetic map<sup>1</sup> were used for anchoring the scaffolds to the linkage groups. In total, 189 scaffolds that account for 43.6 Mb in length (3% of the assembly size) were anchored.

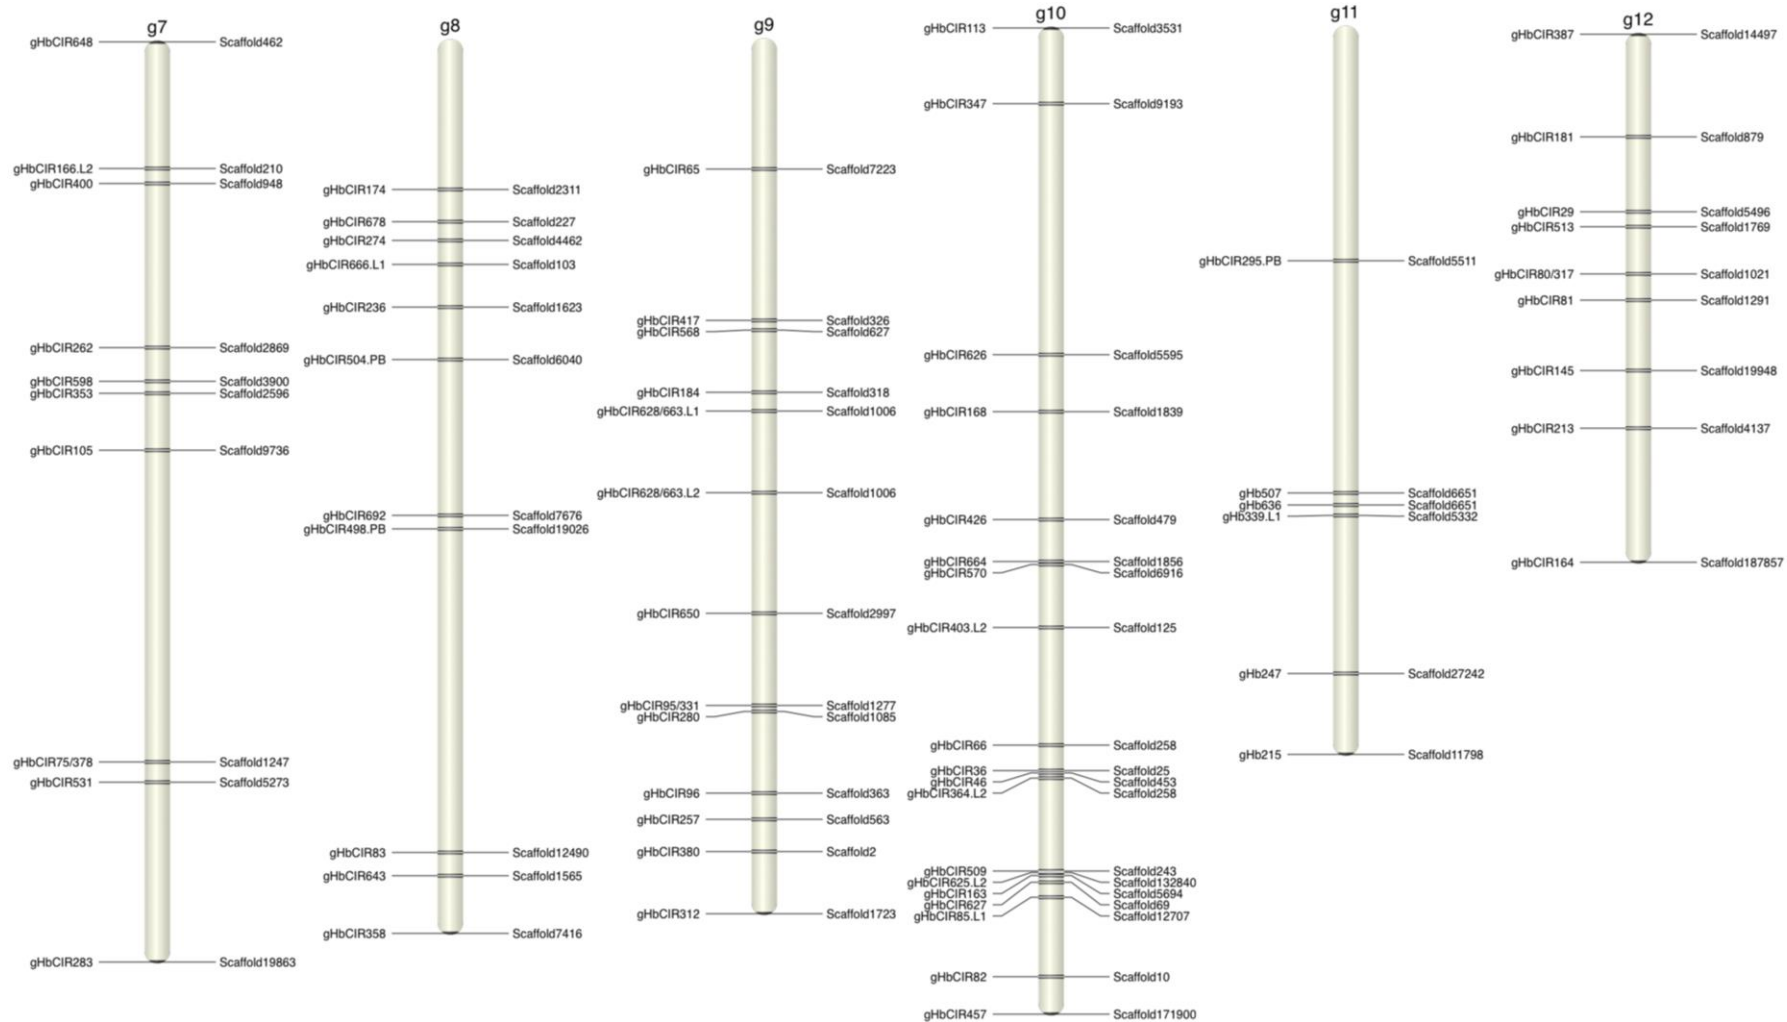

Supplementary Figure 3. Continued.

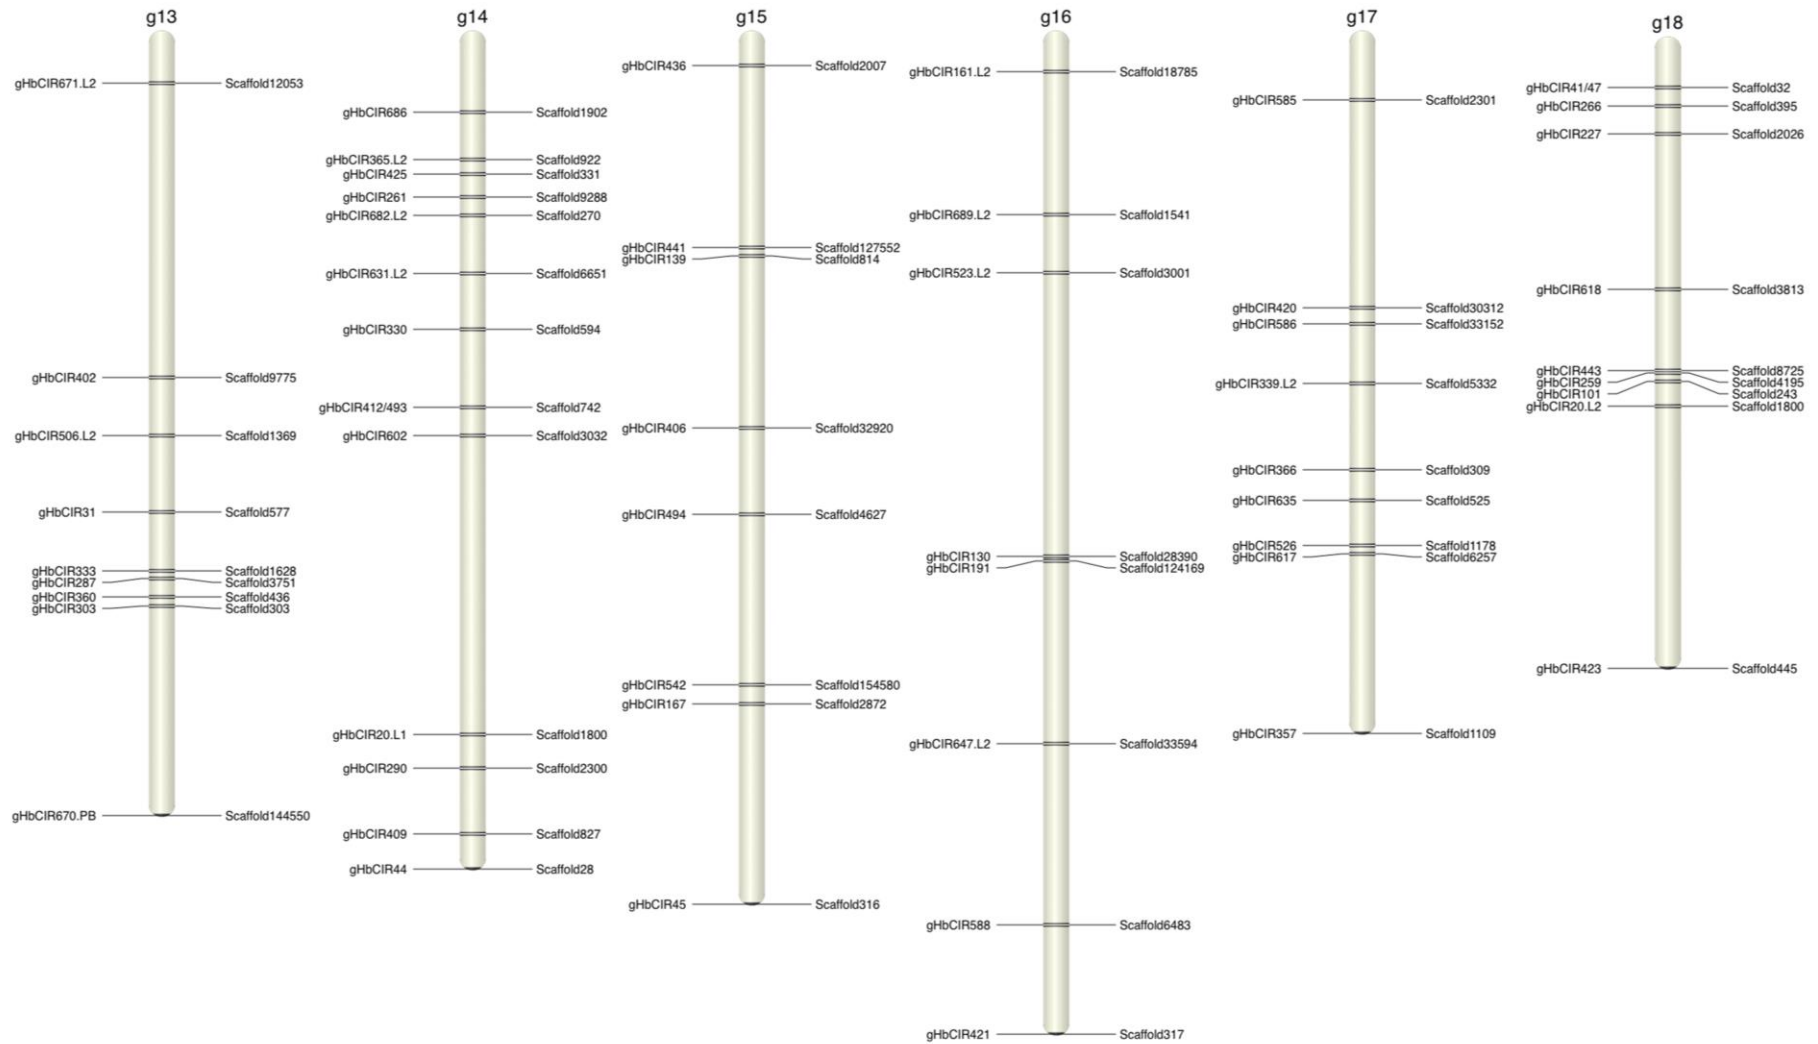

Supplementary Figure 3. Continued.



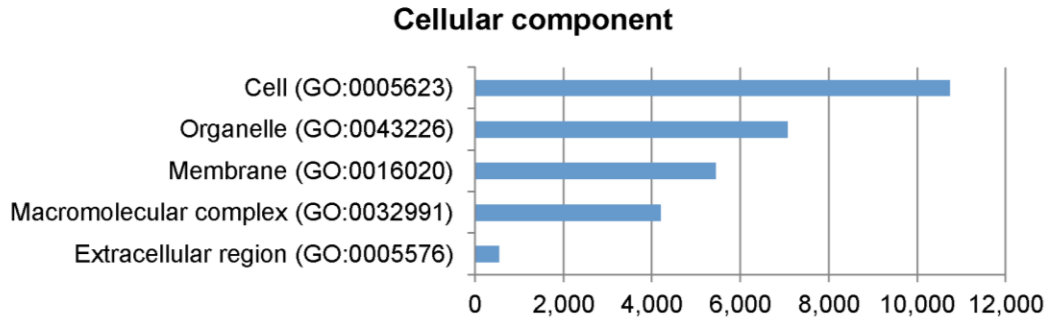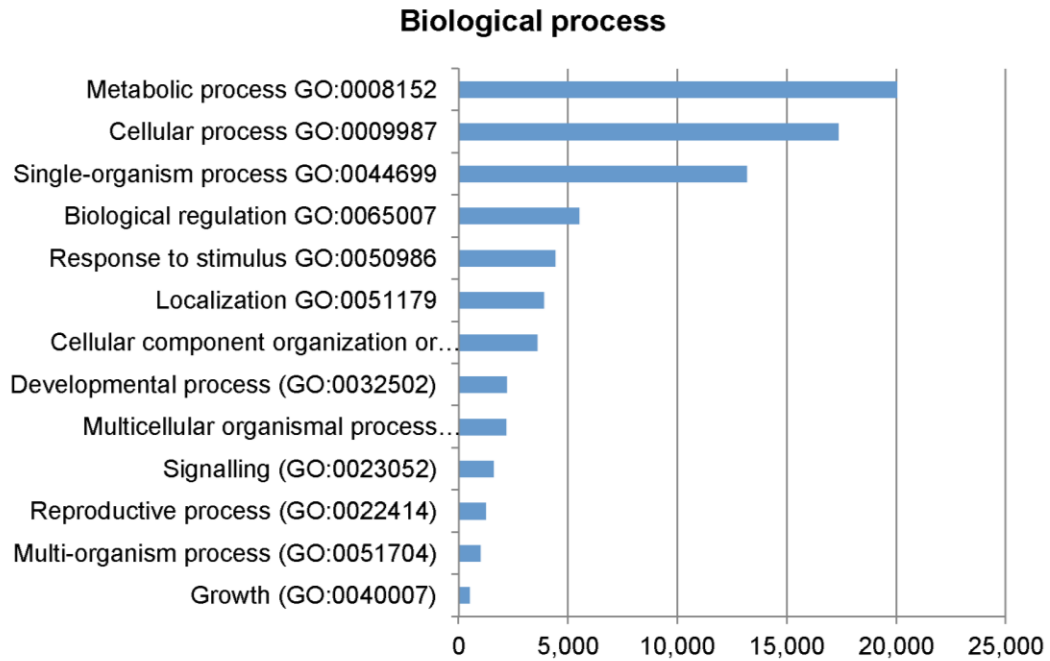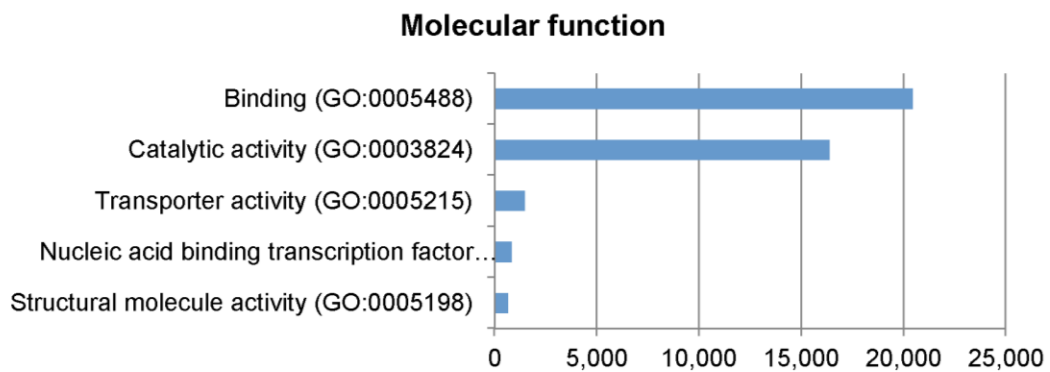

**Supplementary Figure 5. Gene ontology classification of *H. brasiliensis*.** X-axis represents the number of unique genes with GO annotations.



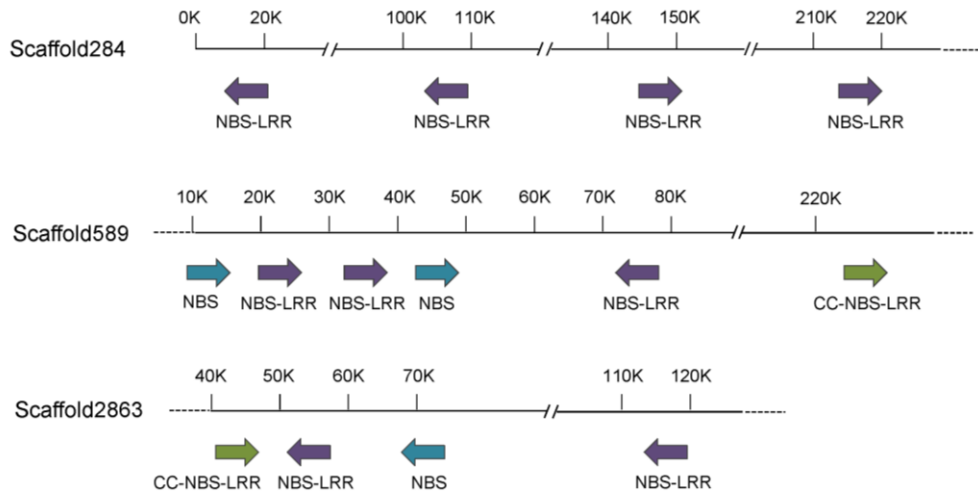

**Supplementary Figure 6. NBS gene clusters in the *H. brasiliensis* genome.** Some of the NBS resistance genes were found organized in gene clusters along the *H. brasiliensis* genome.

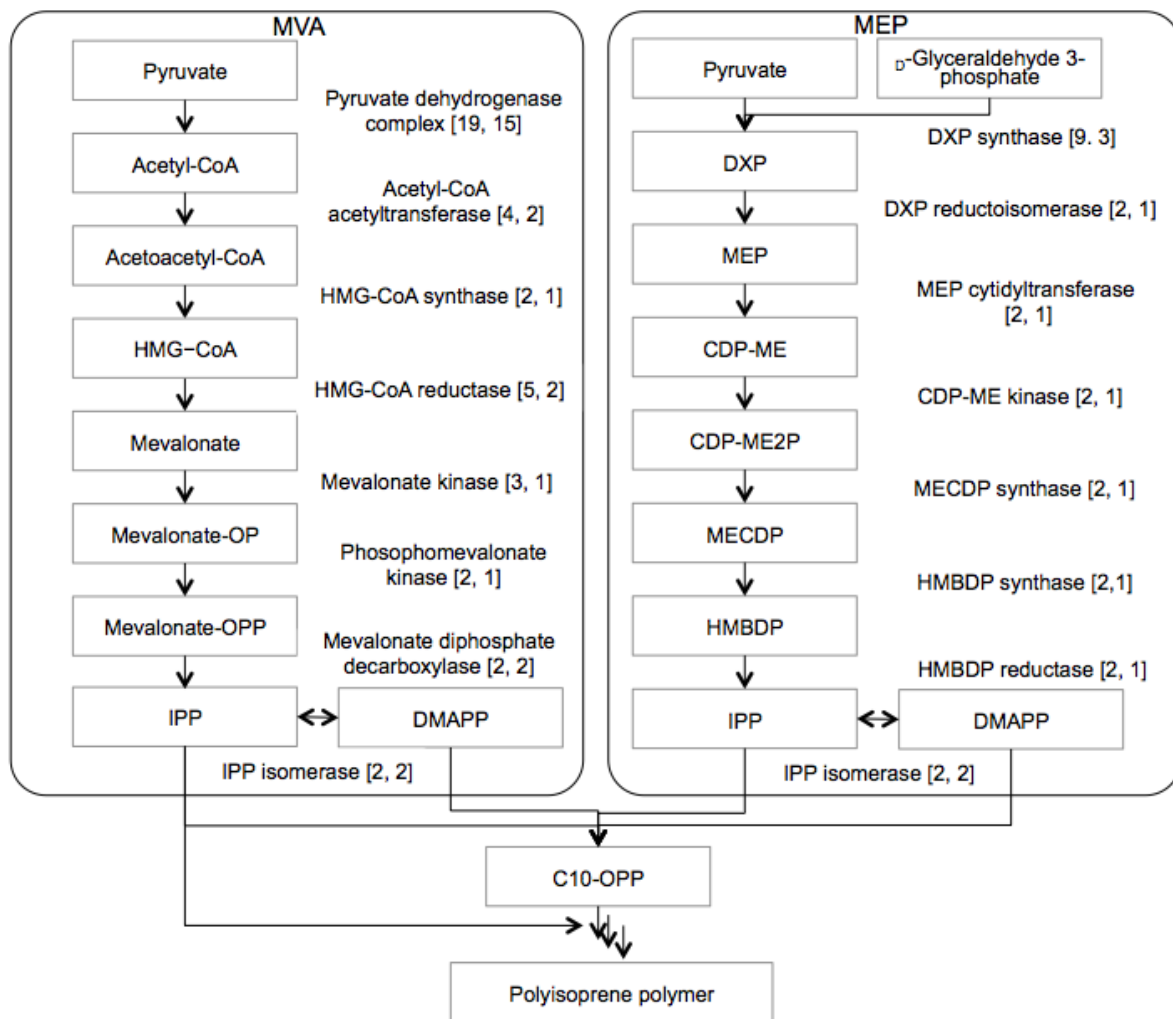

**Supplementary Figure 7. Genes involved in rubber biosynthetic pathways in *H.***

*brasiliensis*. The numbers in square brackets represent the numbers of each gene in *H.*

*brasiliensis* and *A. thaliana*, respectively. MVA pathway: HMG-CoA,

hydroxymethylglutaryl coenzyme A; Mevalonate-OP, mevalonate monophosphate;

Mevalonate-OPP, mevalonate diphosphate; IPP, isopentenyl diphosphate; DMAPP,

dimethylallyl diphosphate; C10-OPP, isoprenyl diphosphate. MEP pathway: DXP, 1-deoxy-

$\text{D}$ -xylulose-5-phosphate; MEP, 2-C-methyl- $\text{D}$ -erythritol 4-phosphate; CDP-ME, 2-C-methyl-

$\text{D}$ -erythritol-4-phosphate; CDP-ME2P, 4-(cytidine 5'-diphospho)-2-C-methyl- $\text{D}$ -erythritol;

MECDP, 2-C-methyl- $\text{D}$ -erythritol 2,4-cyclodiphosphate; HMBDP, 4-hydroxy-3-methyl-but-

2-en-1-yl diphosphate.

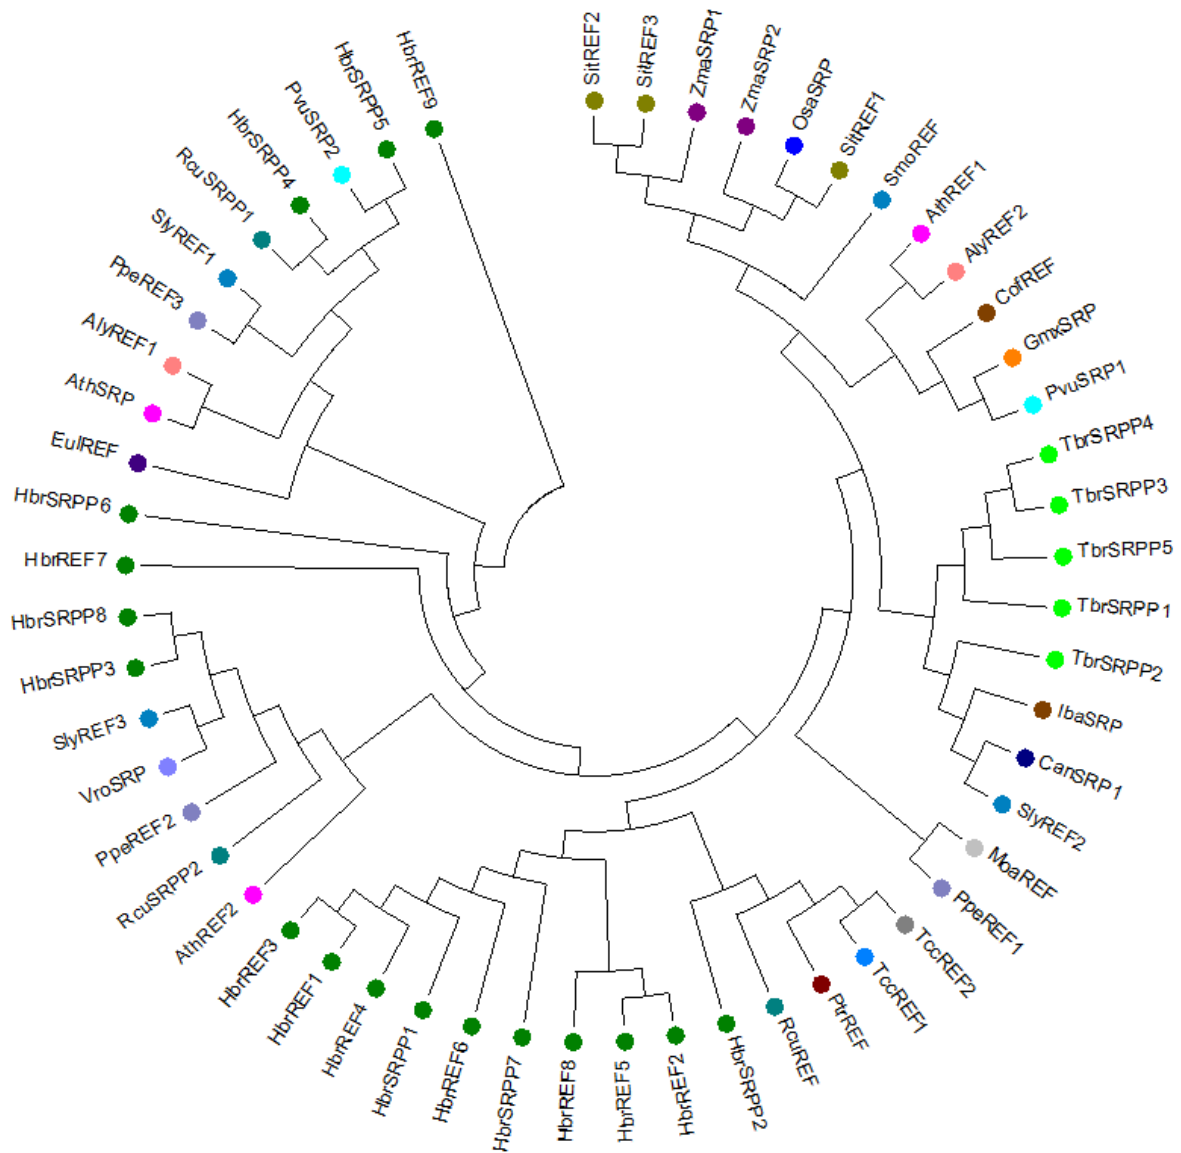

**Supplementary Figure 8. Phylogenetic analysis of the REF and SRPP protein family based on the maximum-likelihood method using MEGA (version 6.06).** Three letter codes: Ath, *A. thaliana*; Aly, *Arabidopsis lyrata*; Cof, *Copaifera officinalis*; Eul, *Eucommia ulmoides*; Gmx, *Glycine max*; Hbr, *H. brasiliensis*; Iba, *Ipomoea batatas*; Moa, *Morus alba*; Osa, *O. sativa*; Ptc, *Populus trichocarpa*; Pvu, *Phaseolus vulgaris*; Ppe, *Prunus persica*; Rcu, *R. communis*; Sly, *S. lycopersicum*; Sit, *Setaria italica*; Smo, *Selaginella moellendorffii*; Tbr, *Taraxacum brevicorniculatum*; Tcc, *Theobroma cacao*; Vro, *Vitis riparia*; Vvi, *V. vinifera*; Zma, *Zea mays*.

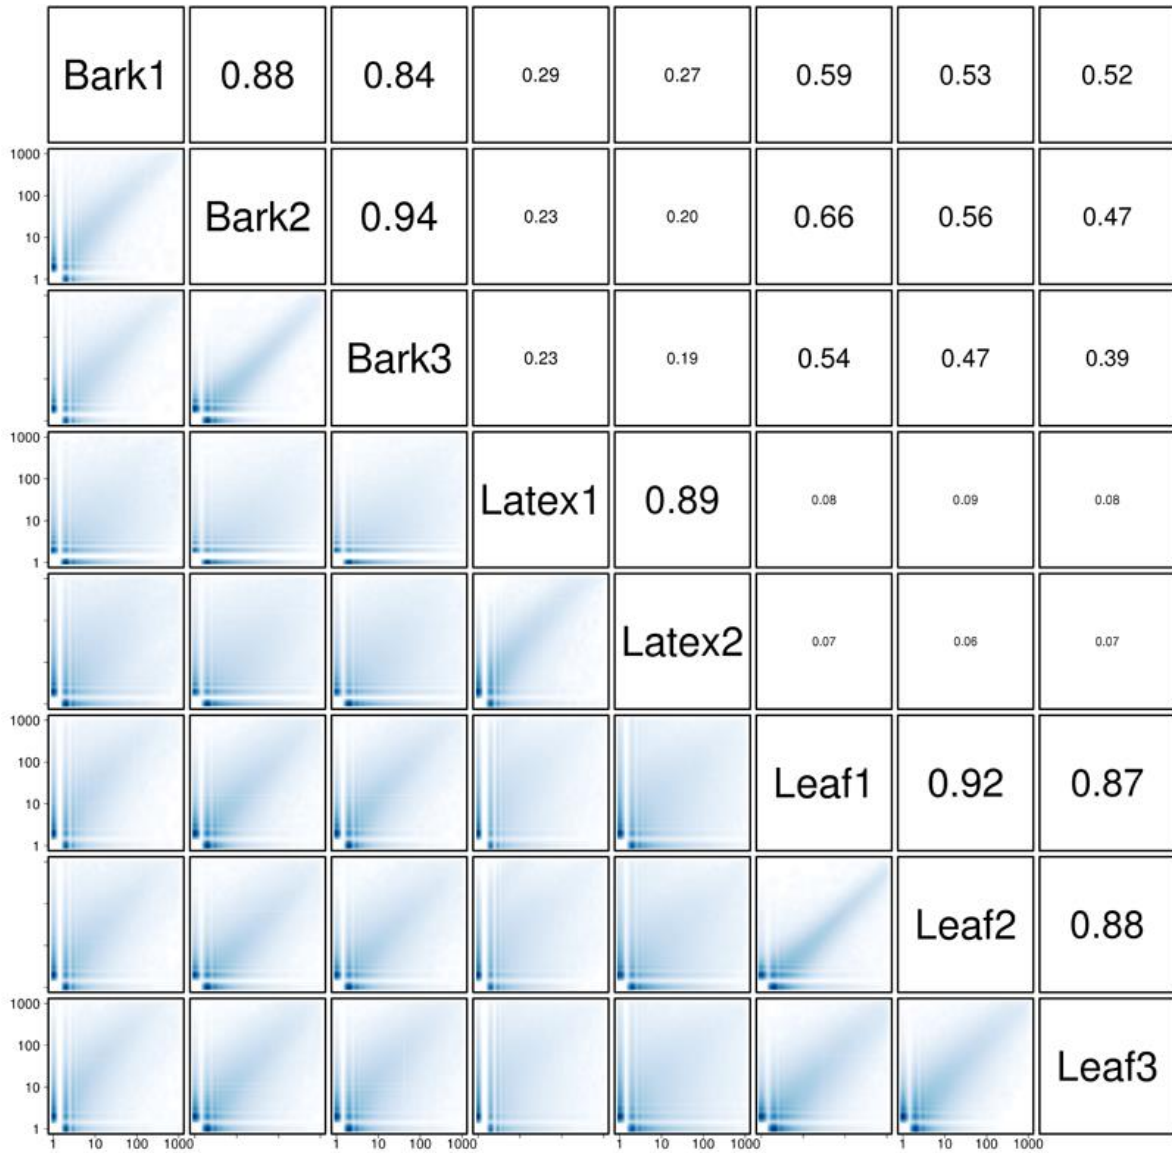

**Supplementary Figure 9. Correlation of raw CAGE tag counts per TSS.** Pairwise scatter plot of CAGE tag counts per TSS and correlation between all possible pairs of samples. Numbers in the boxes correlate with the values of the correlation coefficients.

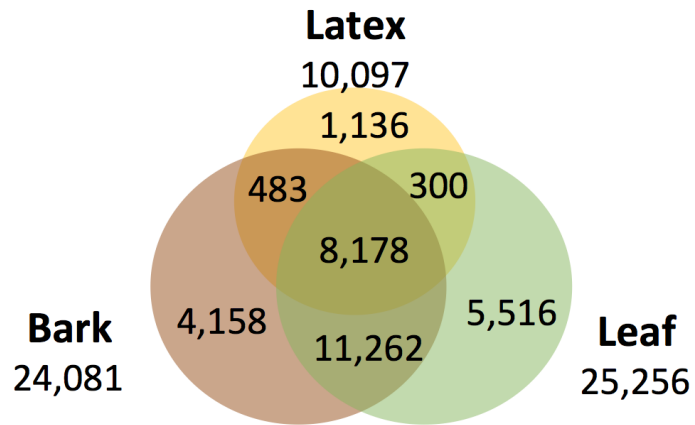

**Supplementary Figure 10. Venn diagram of tissue-specific transcription start site clusters.** RECLU<sup>2</sup>, a reproducible clustering pipeline with multiple scales was used to analyze the CAGE data.

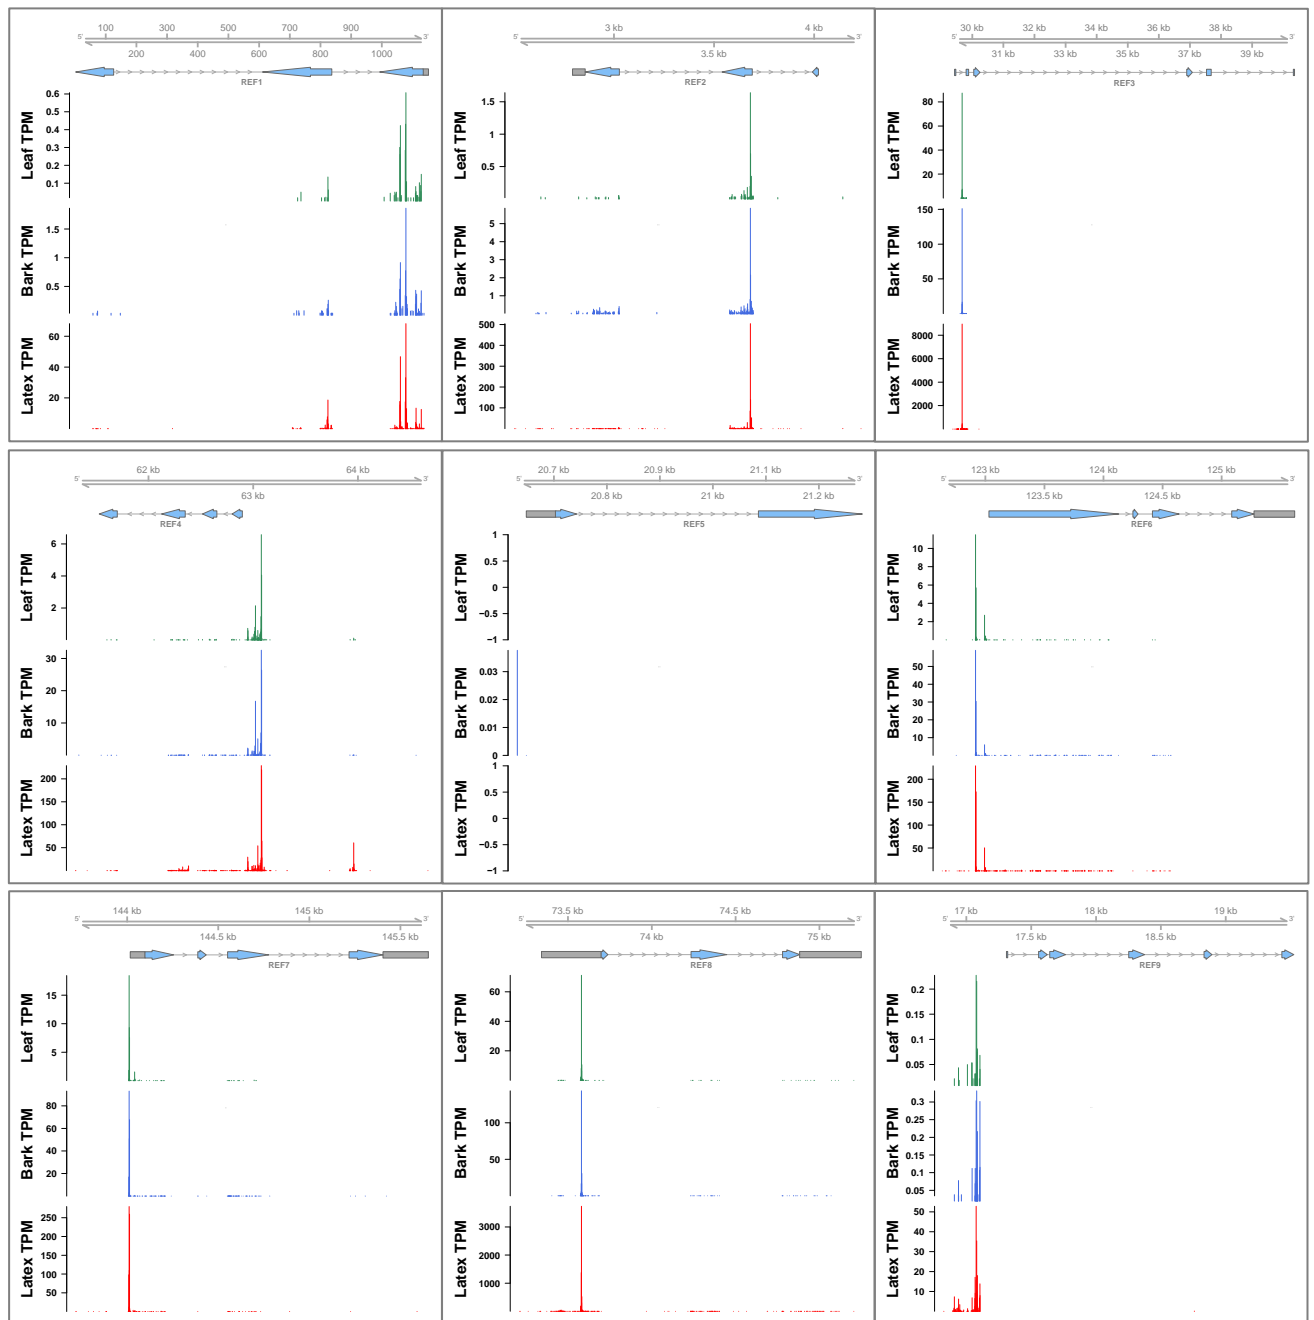

**Supplementary Figure 11. CAGE tag cluster distribution for REF1-9 in leaf, bark and latex.** The top arrows represent Maker-P predicted gene structures; grey boxes are 5'/3' UTR and blue arrows are CDSs. The histograms show normalized expression (TPM, tags per million) and position of TSSs. Each histogram has a different scale for TPM. The relative locations of each gene in the scaffold are indicated at the top of the figure.

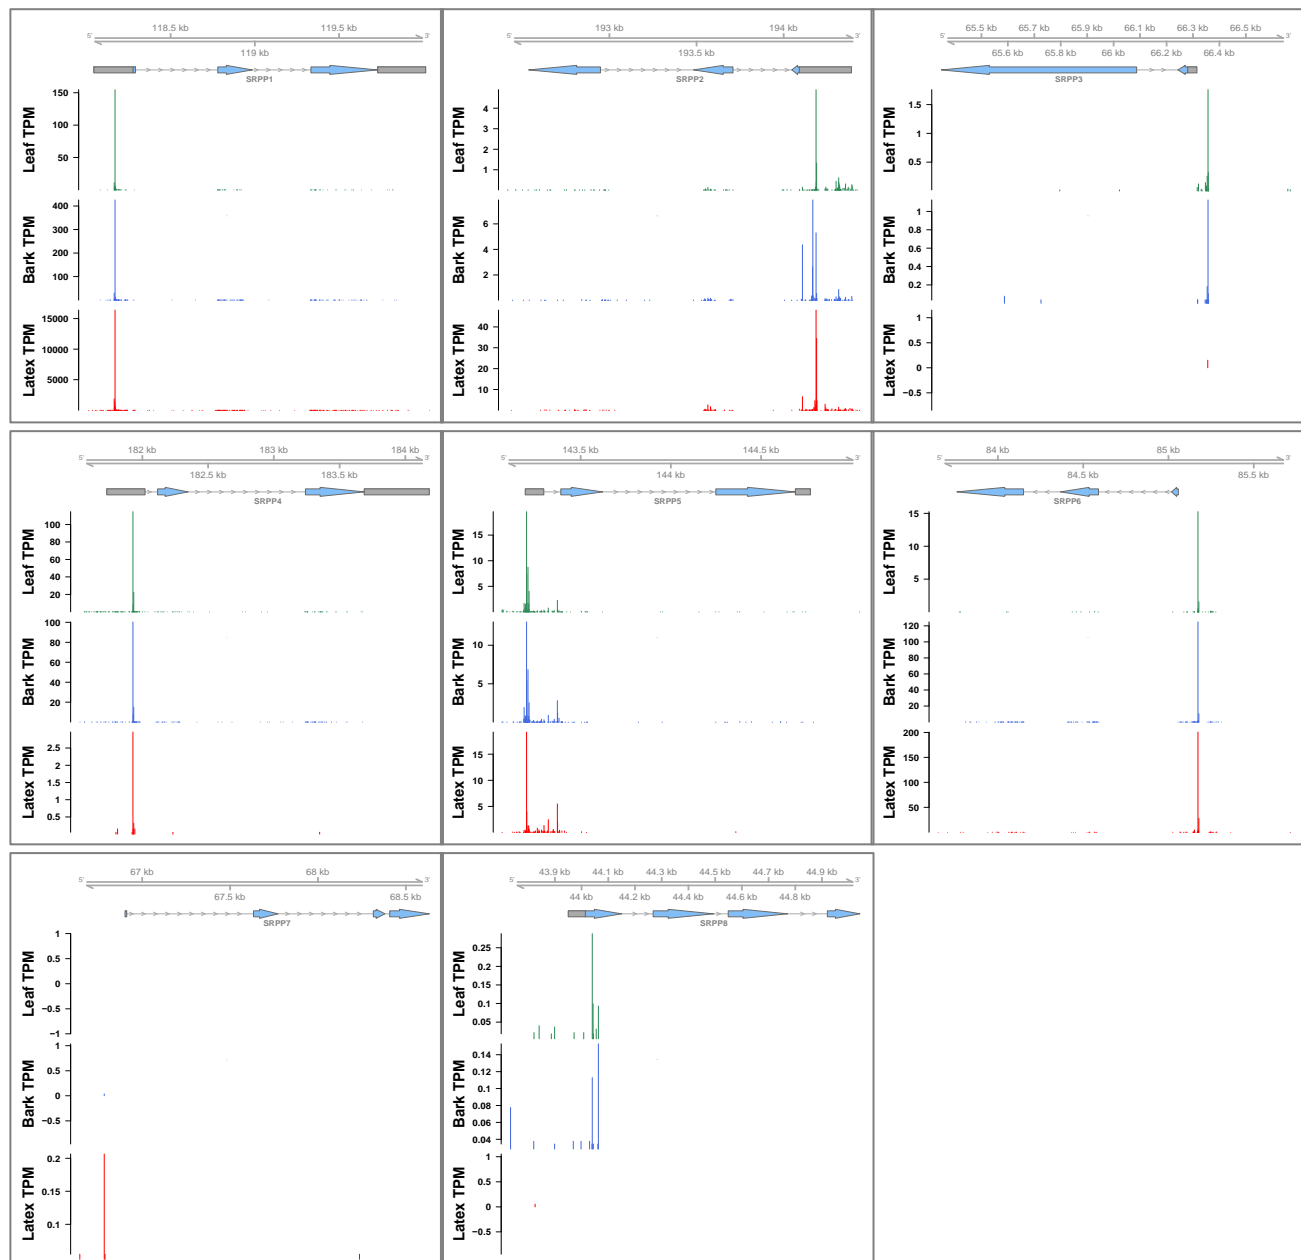

**Supplementary Figure 12. CAGE tag cluster distribution for SRPP1-8 in leaf, bark and latex.** The top arrows represent Maker-P predicted gene structures; grey boxes are 5'/3' UTR and blue arrows are CDSs. The histograms show normalized expression (TPM) and position of TSSs. Each histogram has a different scale for TPM. The relative locations of each gene in the scaffold are indicated at the top of the figure.

# Prenyl-PP biosynthesis

## Isopentenyl-diphosphate delta isomerase

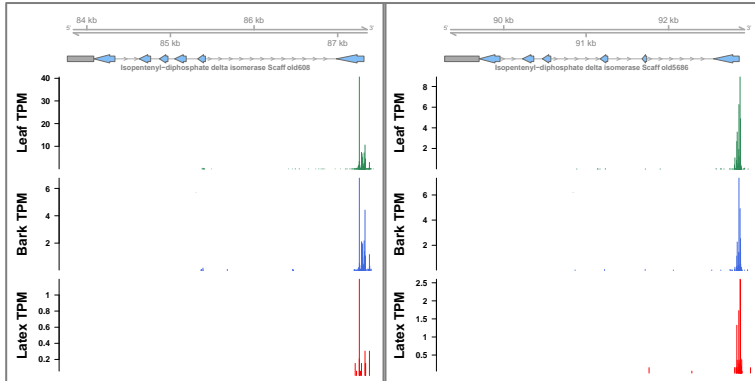

## Dimethylallyltransferase

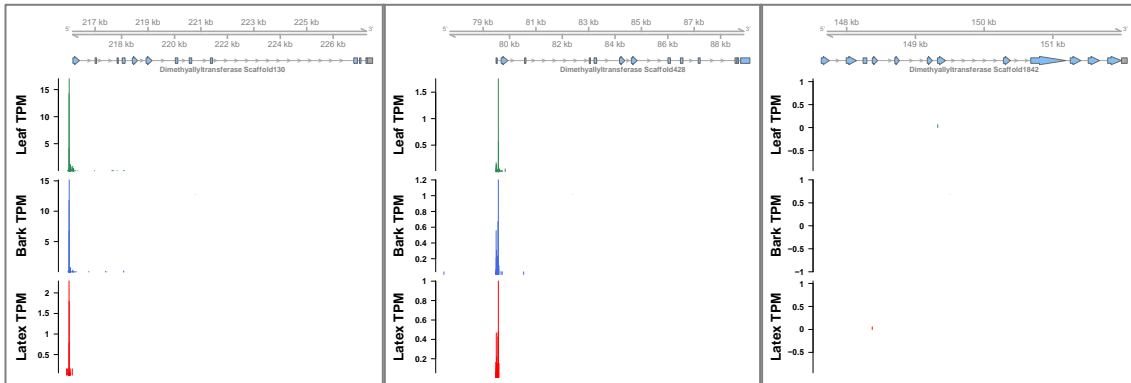

## Farnesyl diphosphate synthase

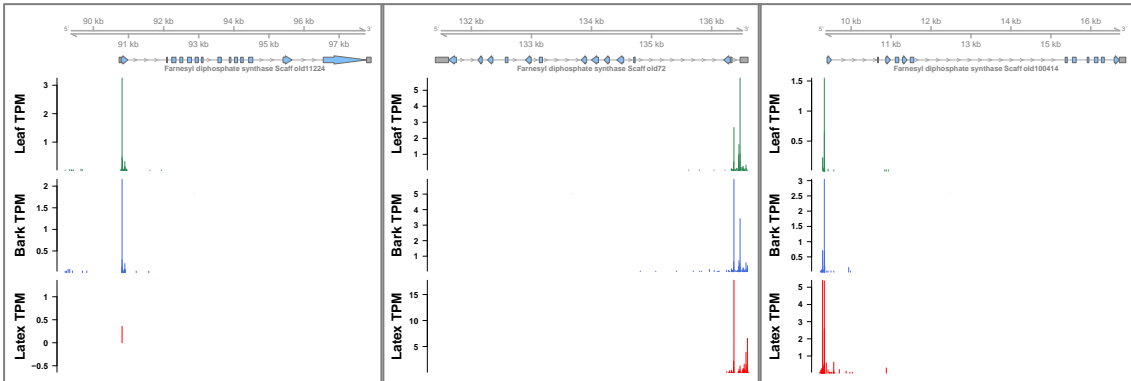



# Geranyl diphosphate synthase

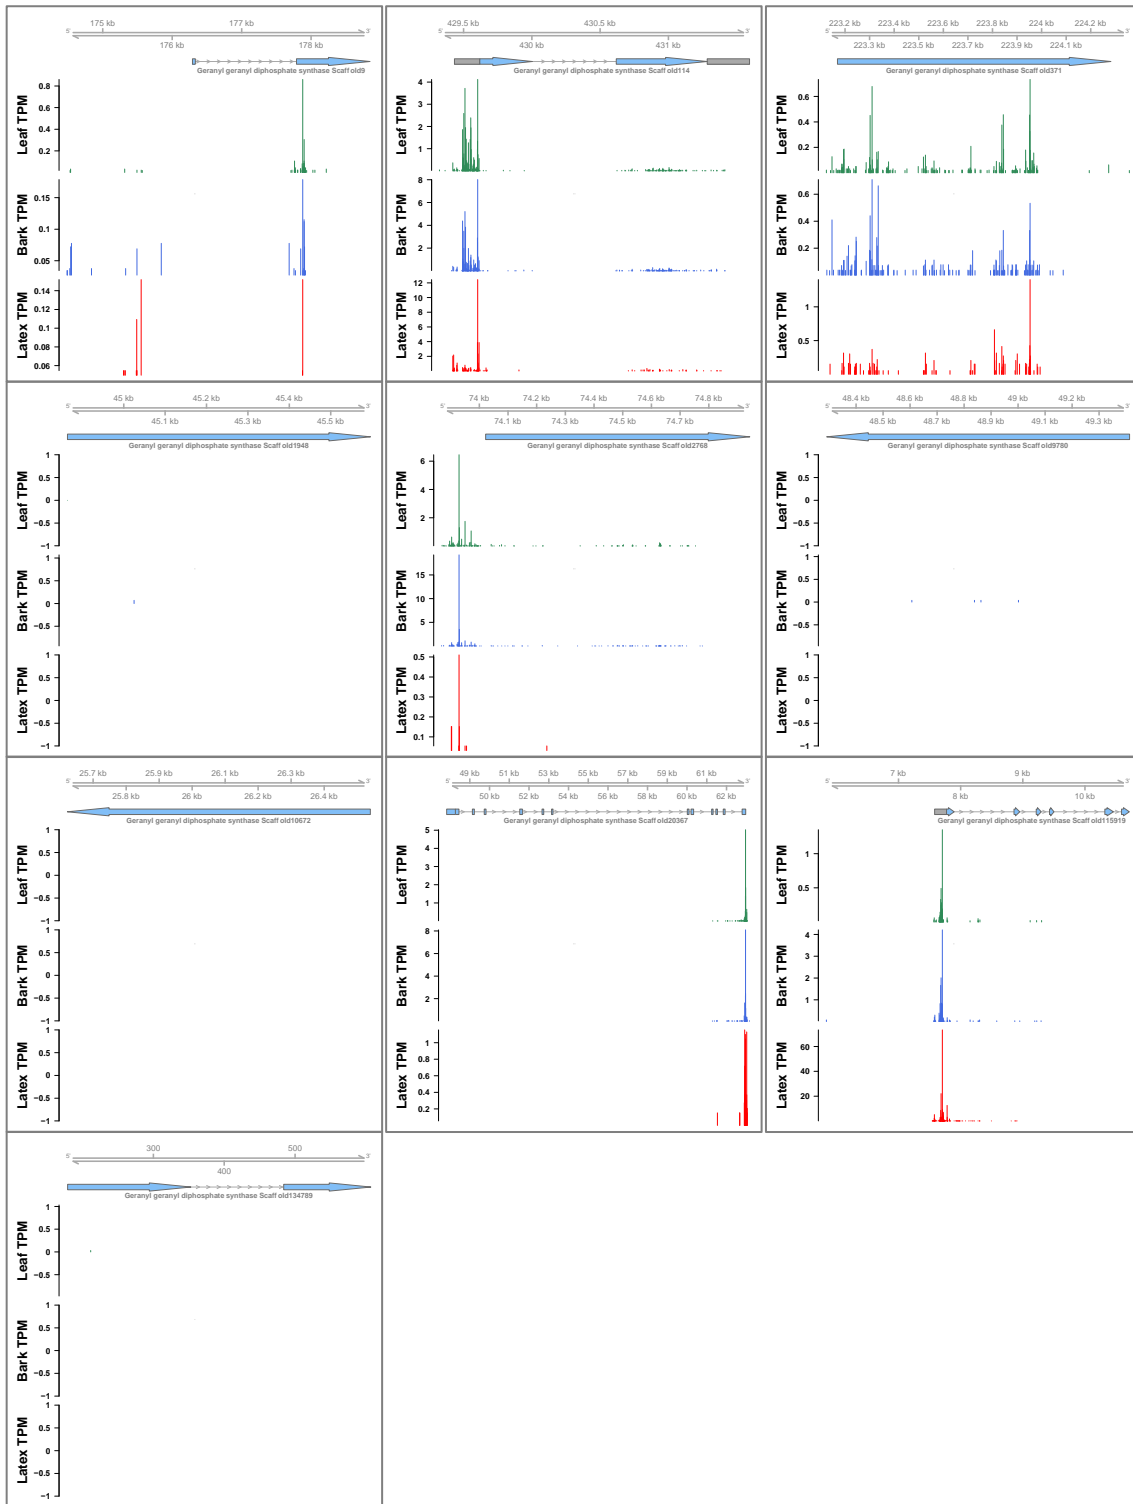

# MVA pathway

## Pyruvate dehydrogenase

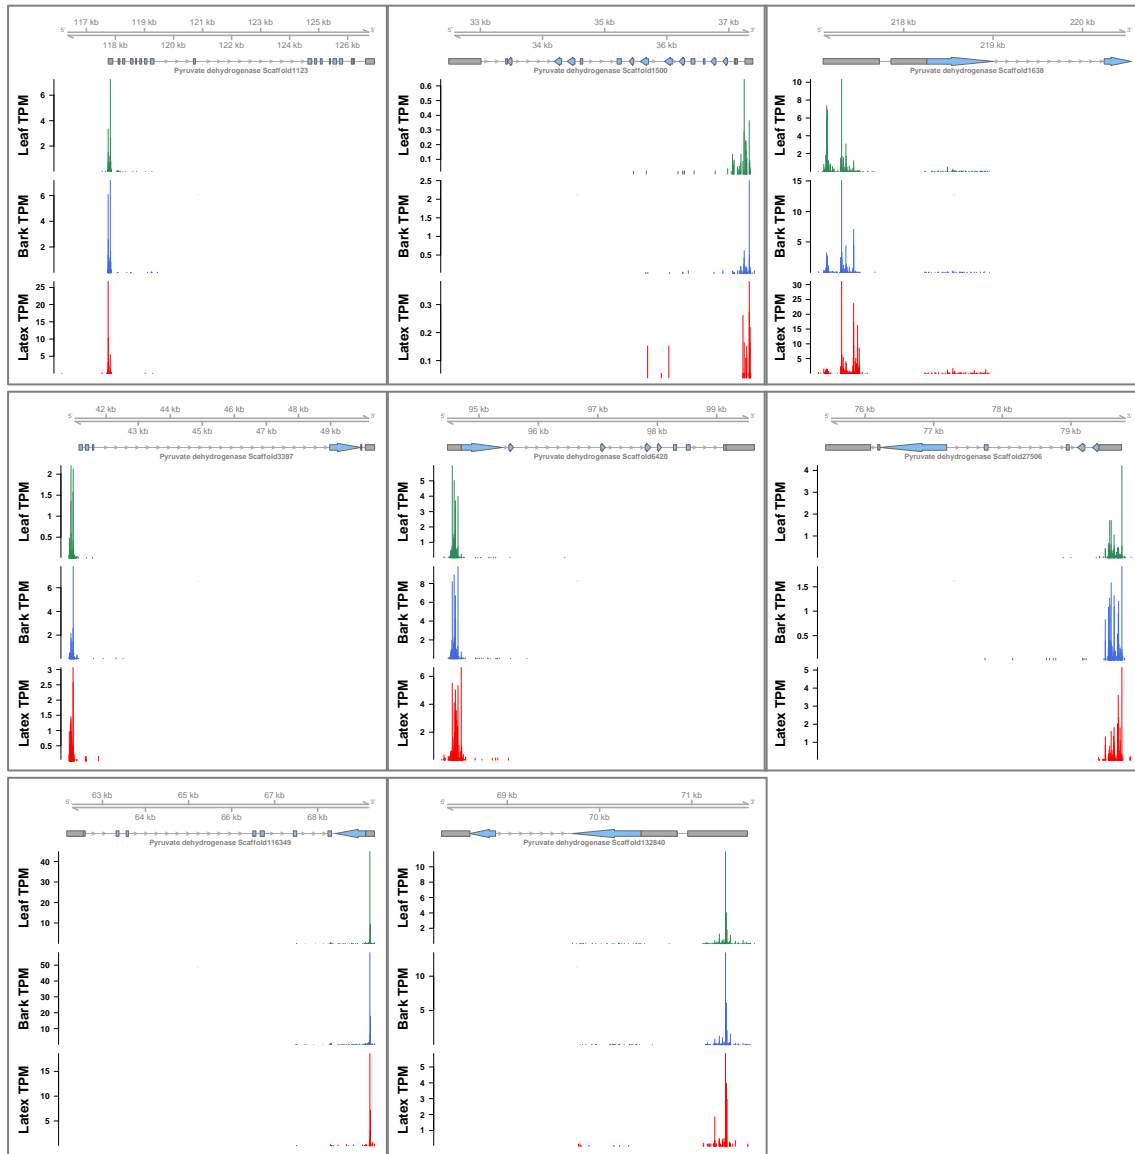

# Dihydropylysine-residue acetyltransferase component of pyruvate dehydrogenase complex

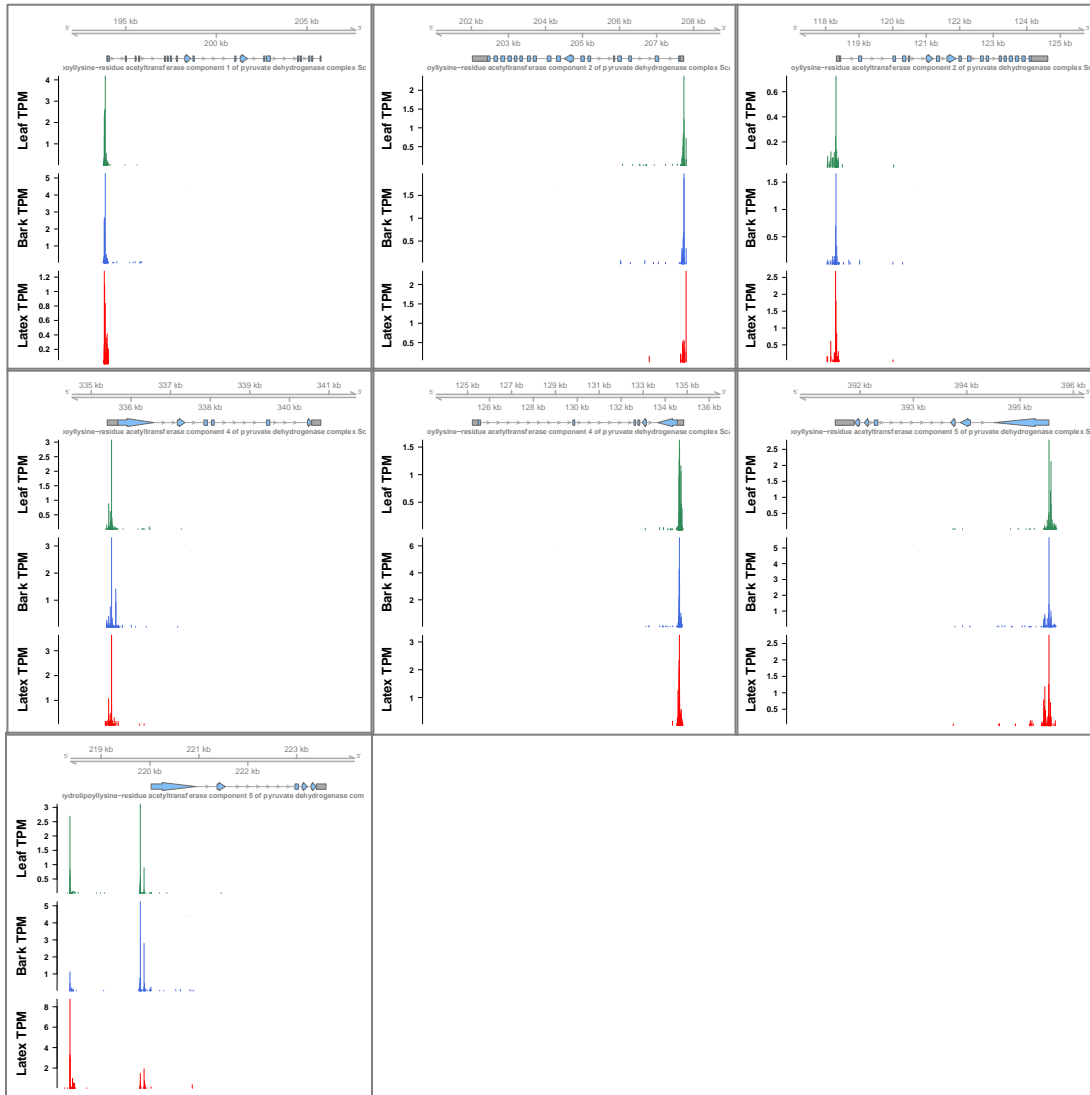

## Dihydropolipamide dehydrogenase

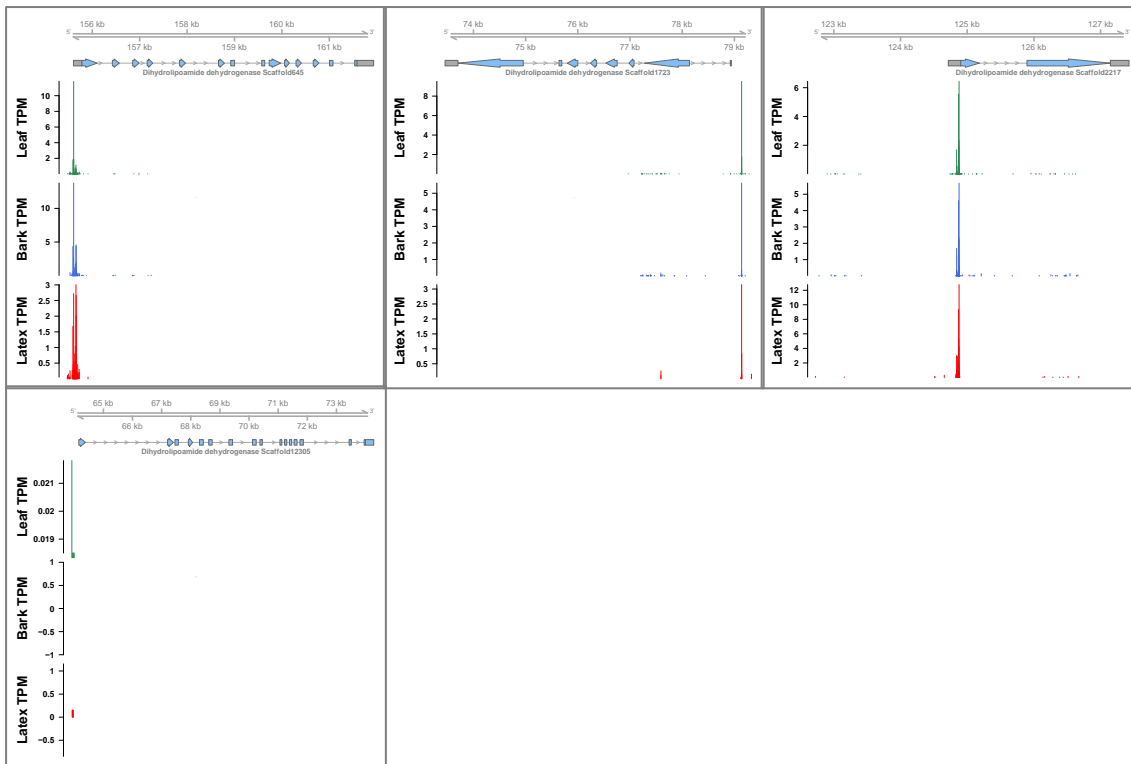

## Acetyl-CoA acetyltransferase

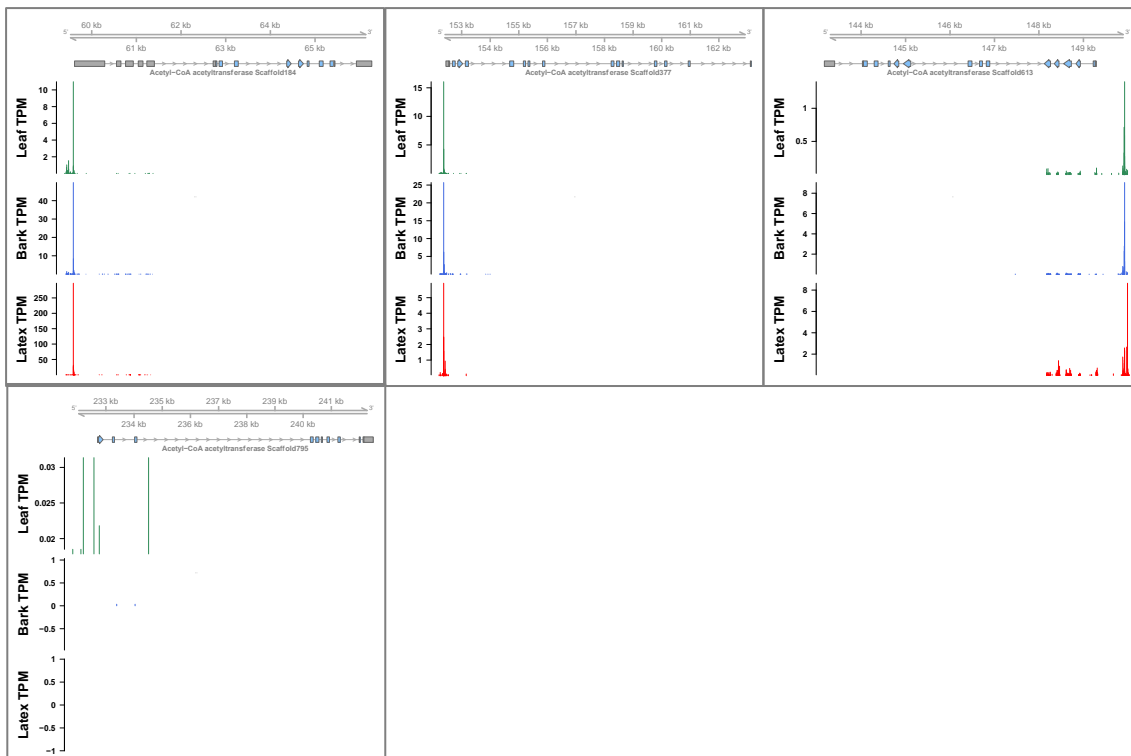

## Hydroxymethylglutaryl coenzyme A synthase

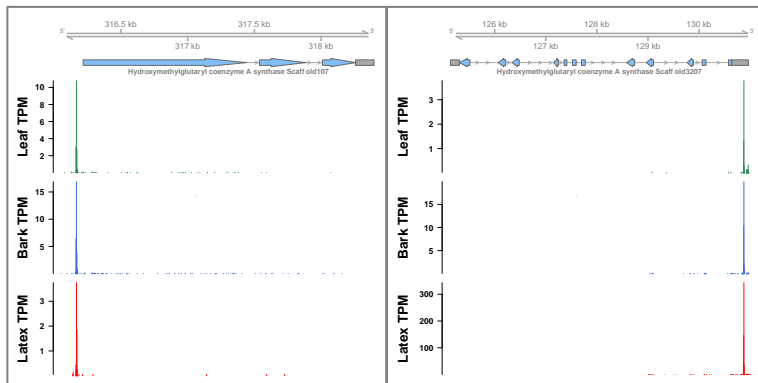

## Hydroxymethylglutaryl coenzyme A reductase

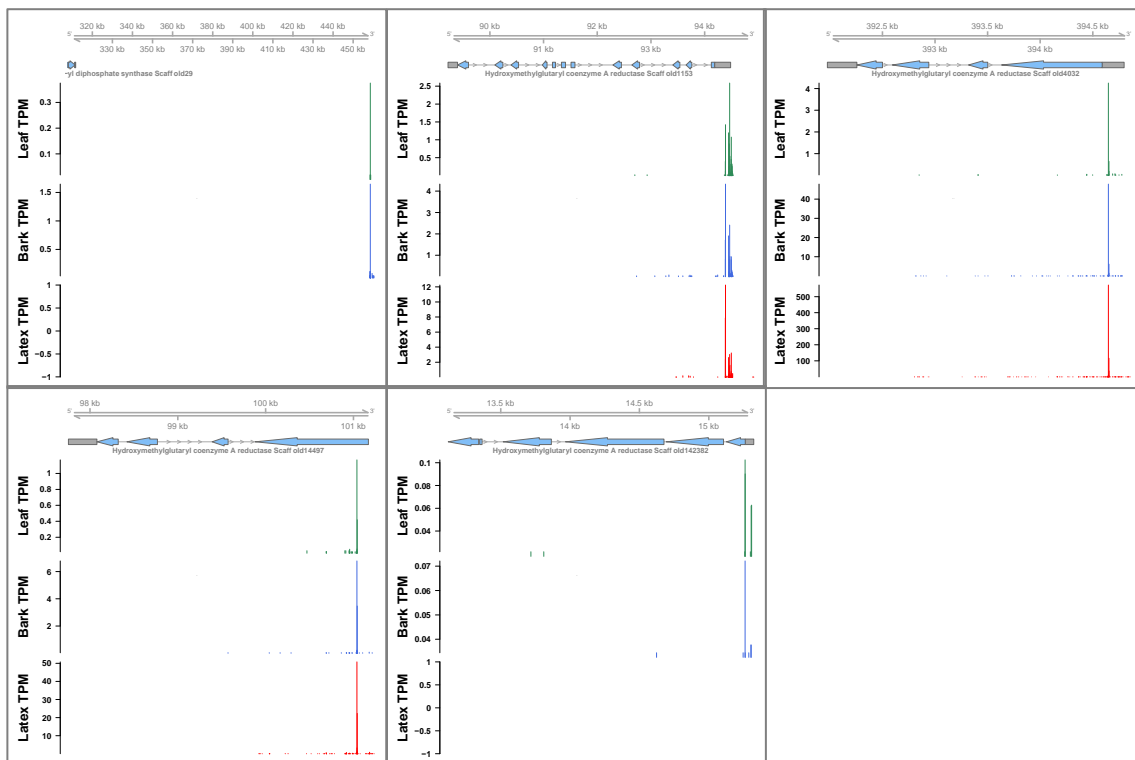

## Mevalonate kinase

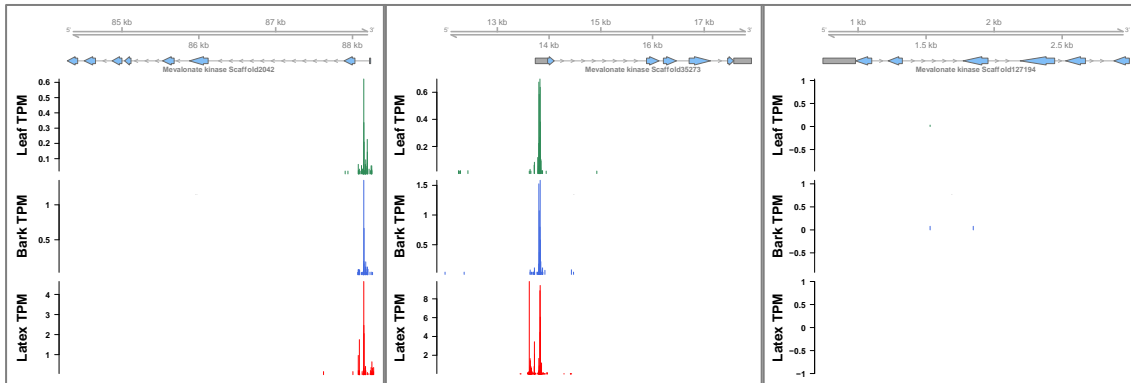

## Phosphomevalonate kinase

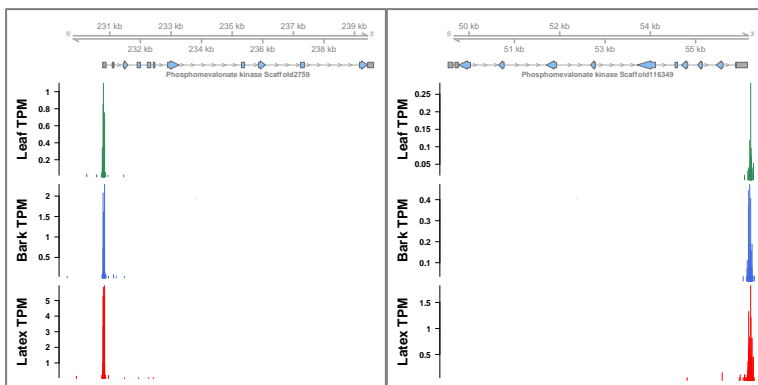

## Mevalonate diphosphate decarboxylase

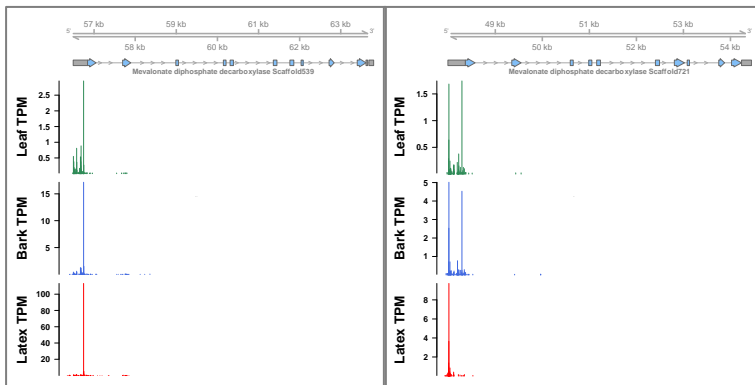

# MEP pathway

## 1-deoxy-D-xylulose-5-phosphate synthase

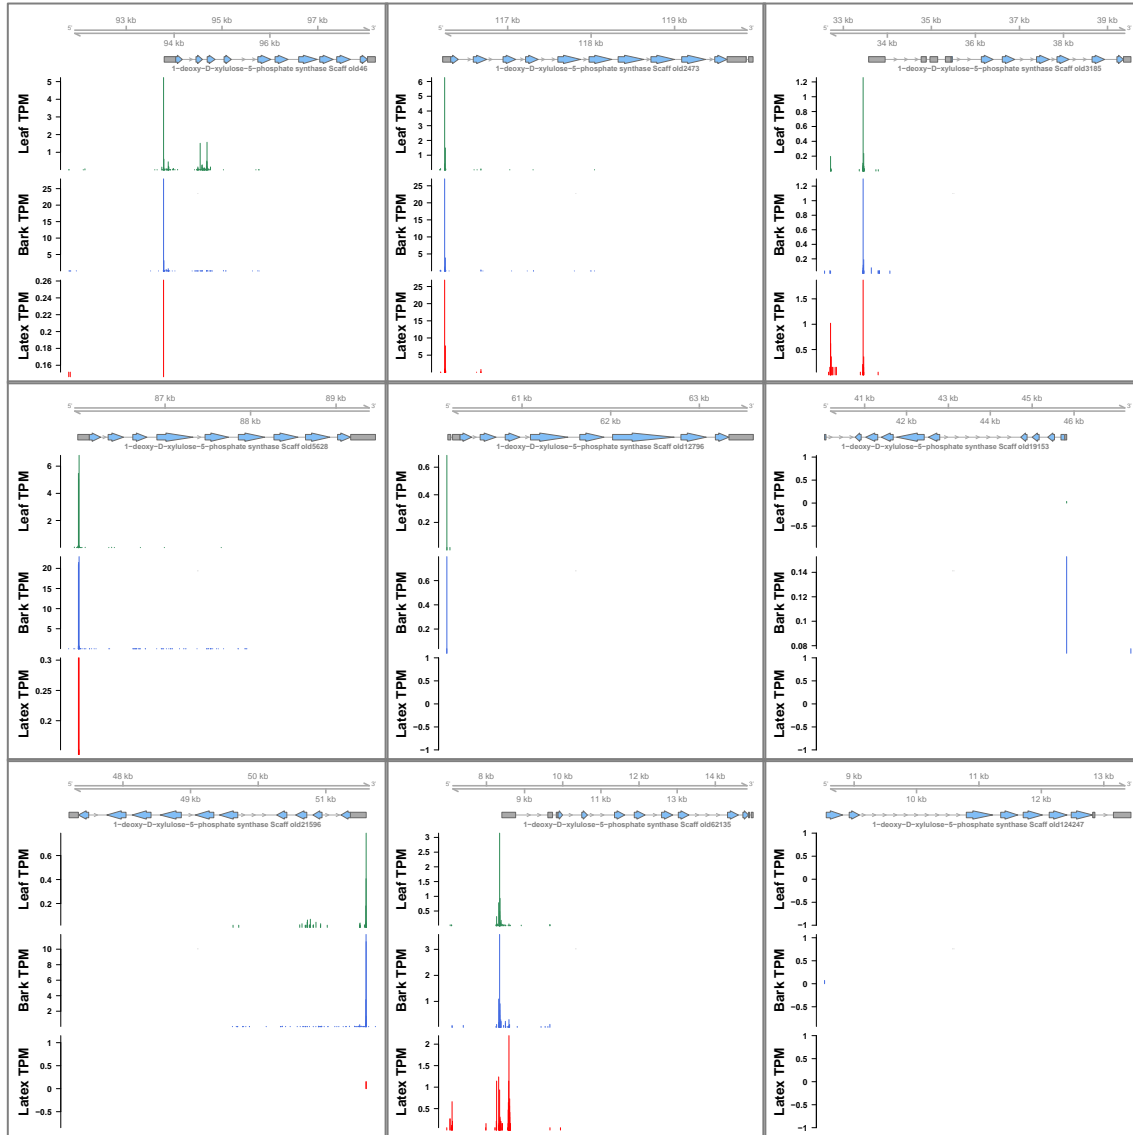

## 1-deoxy-D-xylulose 5-phosphate reductoisomerase

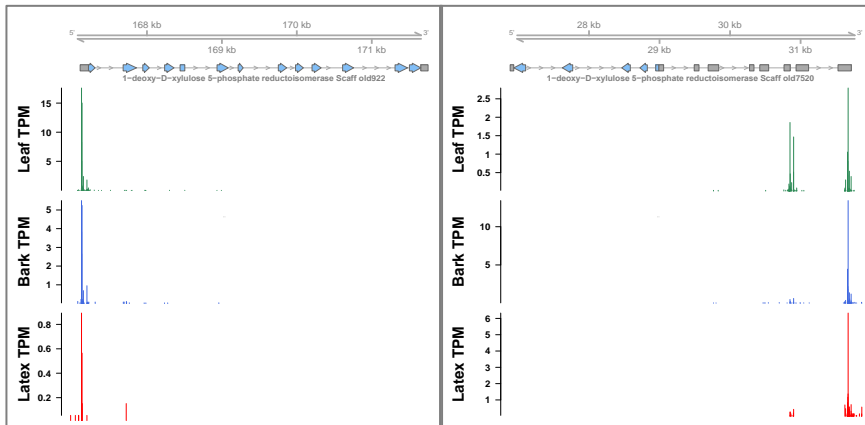

## 2-C-methyl-D-erythritol 4-phosphate cytidyltransferase

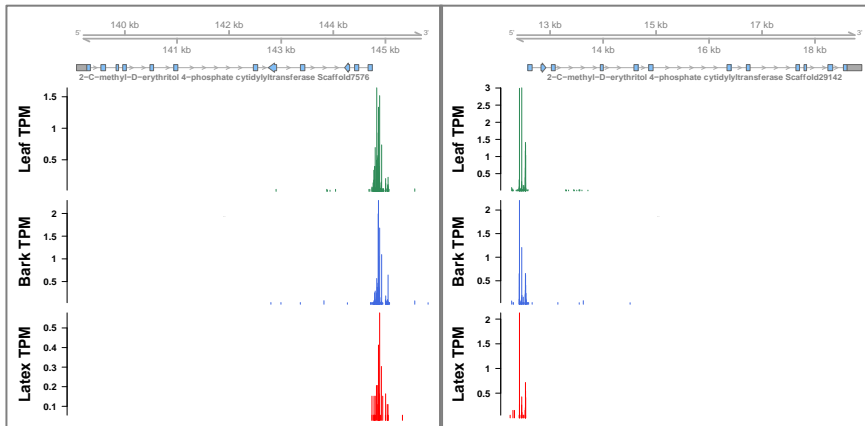

## 4-(cytidine 5'-diphospho)-2-C-methyl-D-erythritol kinase

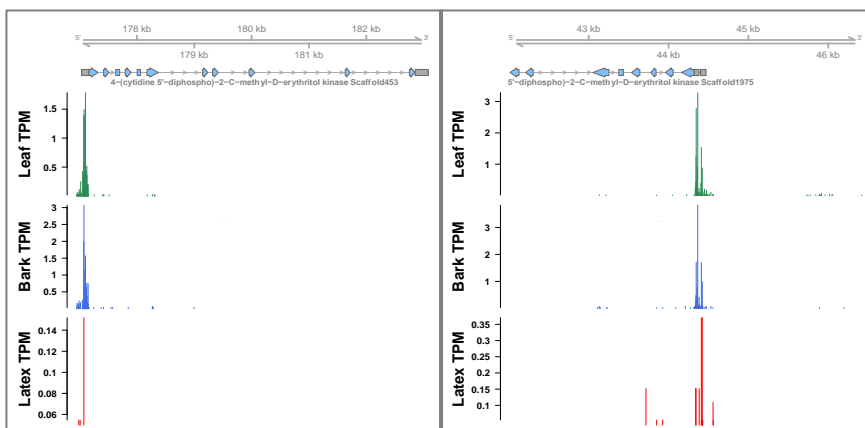



## 2-C-methyl-D-erythritol 2,4-cyclodiphosphate synthase

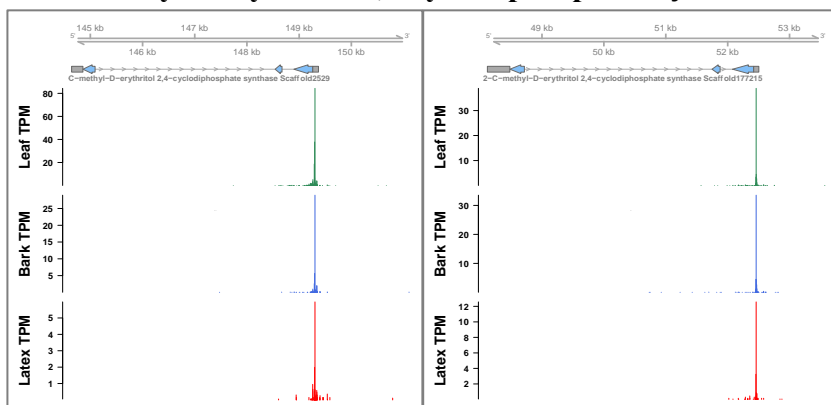

## 4-hydroxy-3-methylbut-2-en-1-yl diphosphate synthase

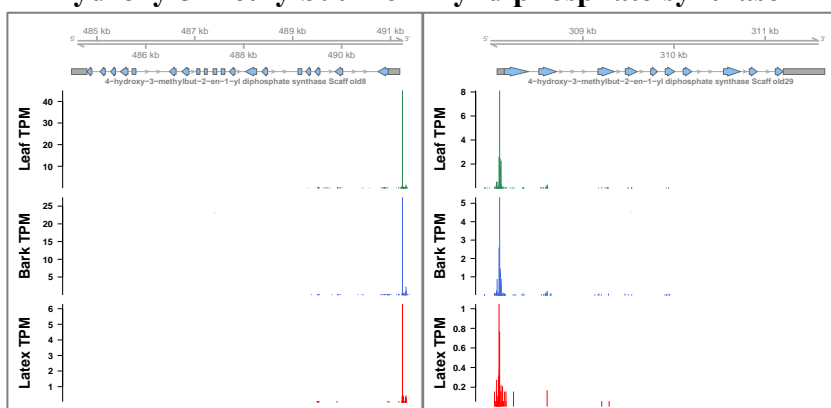

## 4-hydroxy-3-methylbut-2-enyl diphosphate reductase

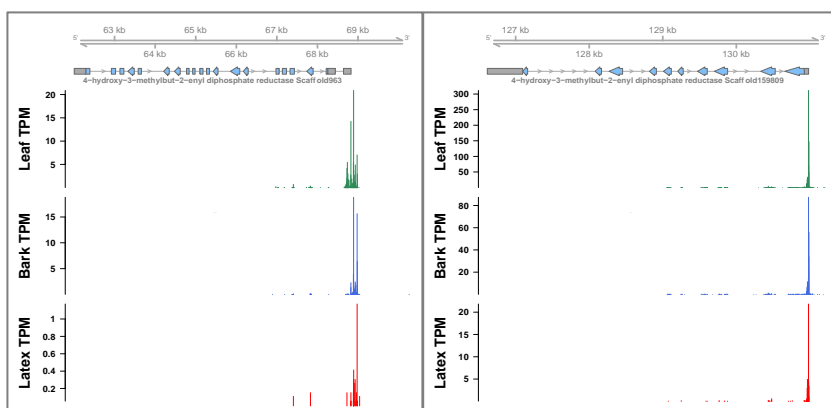

**Supplementary Figure 13.** CAGE tag cluster distributions for prenyl-PP biosynthetic, MVA and MEP pathway genes in leaf, bark and latex. The top arrows represent Maker-P predicted gene structures; grey boxes are 5'/3' UTR and blue arrows are CDSs. The histograms show normalized expression (TPM) and position of TSSs. Each histogram has a different scale for TPM. The relative locations of each gene in the scaffold are indicated at the top of the figure.

**Supplementary Table 1. Summary of the *H. brasiliensis* genome DNA sequencing data.**

| <b>Read type</b>     | <b>Libraries (bp)</b> | <b>No. of reads</b> | <b>Total size<br/>(raw) (Gb)</b> | <b>Read length<br/>(raw) (bp)</b> | <b>Base<br/>coverage</b> |
|----------------------|-----------------------|---------------------|----------------------------------|-----------------------------------|--------------------------|
| Illumina paired-end  | 500                   | 617,052,238         | 93.17                            | 150                               | 43.3                     |
| Illumina mate-paired | 3,000                 | 402,338,096         | 40.23                            | 100                               | 18.7                     |
| Illumina mate-paired | 3,000                 | 21,009,244          | 3.59                             | 300                               | 1.7                      |
| Illumina mate-paired | 5,000                 | 420,866,996         | 42.09                            | 100                               | 19.6                     |
| Illumina mate-paired | 5,000                 | 33,511,336          | 6.05                             | 300                               | 2.8                      |
| Illumina mate-paired | 7,000                 | 476,469,514         | 47.65                            | 100                               | 22.2                     |
| Illumina mate-paired | 7,000                 | 12,745,090          | 2.22                             | 300                               | 1.0                      |
| Illumina mate-paired | 10,000                | 538,405,966         | 53.84                            | 100                               | 25.0                     |
| PacBio               | 10,000                | 6,603,402           | 45.25                            | 6,852                             | 21.0                     |

**Supplementary Table 2. Reference sequences mapped to the *H. brasiliensis* assembly.**

| <b>Reference dataset</b>                  | <b>Number of sequences</b> | <b>Number of sequences mapped</b> | <b>% of sequences mapped</b> | <b>Covered by assembly (%)</b> |
|-------------------------------------------|----------------------------|-----------------------------------|------------------------------|--------------------------------|
| EST                                       | 51,631                     | 49,998                            | 96.8                         | 94.8                           |
| Leaf transcriptome <sup>3</sup>           | 66,841                     | 66,064                            | 98.8                         | 95.5                           |
| Latex transcriptome <sup>3</sup>          | 48,105                     | 47,618                            | 99.0                         | 94.4                           |
| Leaf and latex transcriptome <sup>4</sup> | 67,289                     | 66,950                            | 99.5                         | 95.9                           |
| Leaf and latex unigene <sup>5</sup>       | 48,768                     | 45,307                            | 92.9                         | 93.7                           |
| Bark transcriptome <sup>3</sup>           | 91,555                     | 88,493                            | 96.7                         | 96.5                           |
| Bark unigene <sup>6</sup>                 | 22,646                     | 20,498                            | 90.5                         | 96.1                           |
| Bark transcriptome <sup>7</sup>           | 28,212                     | 28,065                            | 99.5                         | 94.1                           |

All available *H. brasiliensis* ESTs sequences were downloaded from NCBI and aligned on the assembled scaffolds using BLASTN with a 90% identity cutoff. Transcriptome data from leaf, latex and bark tissues published by Chow *et al.*<sup>3</sup> were first assembled using Oases<sup>8</sup> and subsequently mapped to the scaffolds. Assembled latex, leaf and bark transcripts reported by Rahman *et al.*<sup>4</sup> and Li *et al.*<sup>6</sup> were downloaded from NCBI with accession numbers JT914190-JT981478 and JR344291-JR366936, respectively. Latex and leaf unigenes reported by Xia *et al.*<sup>5</sup> were downloaded from NCBI (accession number GSE26514). Bark transcripts described by Triwitayakorn *et al.*<sup>7</sup> were obtained from <http://www4a.biotec.or.th/rubber>.

**Supplementary Table 3. Organellar sequence insertions in the *H. brasiliensis* genome assembly.**

a. Mitochondrial DNA insertions

| <b>Range (bp)</b> | <b>Insertion frequency</b> | <b>Insertion size (bp)</b> |
|-------------------|----------------------------|----------------------------|
| <500              | 297                        | 304,986                    |
| 500-1,000         | 65                         | 69,058                     |
| 1,001-5,000       | 59                         | 123,355                    |
| 5,001-10,000      | 10                         | 45,041                     |
| >10,001           | 14                         | 51,949                     |
| <b>Total</b>      | <b>445</b>                 | <b>594,389</b>             |

b. Chloroplast DNA insertions

| <b>Range (bp)</b> | <b>Insertion frequency</b> | <b>Insertion size (bp)</b> |
|-------------------|----------------------------|----------------------------|
| <500              | 338                        | 56,364                     |
| 500-1,000         | 27                         | 18,858                     |
| 1,001-5,000       | 40                         | 80,567                     |
| 5,001-10,000      | 10                         | 63,666                     |
| >10,001           | 1                          | 11,247                     |
| <b>Total</b>      | <b>416</b>                 | <b>230,702</b>             |

The *H. brasiliensis* genome assembly was aligned by BLASTN against the *H. brasiliensis* mitochondrial genome (NCBI accession number AP014526) and the chloroplast genome (NCBI accession number HQ285842) to identify organellar sequence insertions into the nuclear genome. Alignments with lengths longer than 50 bp and > 90% identity were retained and categorized by size.

**Supplementary Table 4. Repeat composition of *H. brasiliensis* compared with other plant genomes.**

| Repeat elements | Genome (%)             |                    |                   |                               |                        |
|-----------------|------------------------|--------------------|-------------------|-------------------------------|------------------------|
|                 | <i>H. brasiliensis</i> | <i>R. communis</i> | <i>S. bicolor</i> | <i>Nicotiana tabacum K326</i> | <i>Capsicum annuum</i> |
| Retrotransposon | 57.3                   | 18.2               | 54.5              | 52.1                          | 59.5                   |
| SINE            | 0.0                    | 0.0                | 0.0               | 0.3                           | 0.2                    |
| LINE            | 1.1                    | 0.1                | 0.0               | 0.3                           | 1.3                    |
| LTR/Copia       | 11.7                   | 4.8                | 5.2               | 12.6                          | 6.0                    |
| LTR/Gypsy       | 43.6                   | 11.5               | 19.0              | 19.2                          | 51.1                   |
| LTR/others      | 0.9                    | 1.8                | 30.3              | 8.6                           | 0.9                    |
| DNA transposon  | 1.2                    | 0.9                | 7.5               | 3.3                           | 5.42                   |
| Unknown         | 12.6                   | 31.3               | 0.1               | 9.0                           | 14.0                   |

**Supplementary Table 5. Number of gene models with homology or functional classification.**

|             | <b>Database</b> | <b>Number</b> | <b>Percent (%)</b> |
|-------------|-----------------|---------------|--------------------|
| Annotated   | NR              | 64,587        | 76.5               |
|             | SwissProt       | 33,552        | 39.7               |
|             | TrEMBL          | 63,052        | 74.7               |
|             | InterPro        | 55,312        | 65.5               |
|             | GO              | 47,790        | 56.6               |
|             | KEGG            | 61,452        | 72.8               |
| Unannotated |                 | 15,991        | 18.9               |
|             | <b>Total</b>    | 84,440        | 100                |

**Supplementary Table 6. Non-coding RNAs in the *H. brasiliensis* genome assembly.**

| <b>ncRNA</b>        | <b>Copies<br/>(number)</b> | <b>Length<br/>occupied (bp)</b> | <b>Genome (%)</b> |
|---------------------|----------------------------|---------------------------------|-------------------|
| Micro RNA           | 206                        | 26,226                          | 0.0017            |
| Transfer RNA        | 739                        | 55,362                          | 0.0036            |
| Ribosomal RNA       | 271                        | 206,670                         | 0.0133            |
| Spliceosomal RNA    | 192                        | 23,764                          | 0.0015            |
| Small nucleolar RNA | 231                        | 25,291                          | 0.0016            |

**Supplementary Table 7. Enriched GO terms in gene clusters specific to *H. brasiliensis*.**

| <b>Gene Ontology ID</b> | <b>Gene Ontology term</b>            | <b>Enrichment FDR</b> |
|-------------------------|--------------------------------------|-----------------------|
| GO:0008270              | Zinc ion binding                     | 0.0E0                 |
| GO:0043169              | Cation binding                       | 0.0E0                 |
| GO:0046914              | Transition metal ion binding         | 0.0E0                 |
| GO:0046872              | Metal ion binding                    | 0.0E0                 |
| GO:0003676              | Nucleic acid binding                 | 2.4E-257              |
| GO:0005488              | Ion binding                          | 2.0E-144              |
| GO:0097159              | Binding                              | 4.2E-139              |
| GO:1901363              | Organic cyclic compound binding      | 1.2E-93               |
| GO:0017070              | Heterocyclic compound binding        | 1.2E-93               |
| GO:0030623              | U6 snRNA binding                     | 1.8E-6                |
| GO:0004190              | U5 snRNA binding                     | 1.1E-4                |
| GO:0070001              | Aspartic-type endopeptidase activity | 1.1E-4                |
| GO: 0017069             | snRNA binding                        | 2.7E-3                |
| GO:0005681              | Spliceosomal complex                 | 1.0E-2                |
| GO:0003735              | Structural constituents of ribosome  | 2.1E-2                |



**Supplementary Table 8. Summary of number of family members for each transcription factor in *H. brasiliensis* and selected plant genomes.**

| <b>Family</b>   | <i>H. brasiliensis</i> | <i>A. thaliana</i> | <i>S. lycopersicum</i> | <i>O. sativa</i> | <i>R. communis</i> |
|-----------------|------------------------|--------------------|------------------------|------------------|--------------------|
| Alfin-like      | 11                     | 10                 | 10                     | 11               | 5                  |
| AP2             | 28                     | 18                 | 23                     | 190              | 11                 |
| ARF             | 22                     | 37                 | 22                     | 48               | 17                 |
| ARID            | 15                     | 13                 | 14                     | 13               | 10                 |
| ARR-B           | 16                     | 17                 | 15                     | 22               | 11                 |
| AUX/IAA         | 44                     | 40                 | 27                     | 62               | 21                 |
| B3              | 79                     | 78                 | 74                     | 113              | 40                 |
| BBR-BPC         | 6                      | 17                 | 6                      | 7                | 5                  |
| BES1            | 13                     | 14                 | 9                      | 6                | 7                  |
| bHLH            | 158                    | 189                | 140                    | 181              | 102                |
| BSD             | 1                      | 2                  | 1                      | 1                | 1                  |
| bZIP            | 87                     | 126                | 68                     | 135              | 50                 |
| C2C2-CO-like    | 10                     | 18                 | 11                     | 11               | 4                  |
| C2C2-Dof        | 49                     | 47                 | 33                     | 37               | 23                 |
| C2C2-GATA       | 41                     | 41                 | 30                     | 35               | 19                 |
| C2C2-LSD        | 4                      | 12                 | 3                      | 12               | 4                  |
| C2C2-YABBY      | 14                     | 8                  | 9                      | 15               | 6                  |
| C2H2            | 173                    | 125                | 120                    | 167              | 104                |
| C3H             | 91                     | 79                 | 62                     | 85               | 44                 |
| CAMTA           | 8                      | 10                 | 6                      | 7                | 4                  |
| Coactivator p15 | 4                      | 7                  | 2                      | 3                | 2                  |
| CPP             | 11                     | 9                  | 4                      | 20               | 6                  |
| CSD             | 7                      | 4                  | 5                      | 3                | 5                  |
| DBB             | 3                      | 9                  | 5                      | 5                | 7                  |
| DBP             | 3                      | 2                  | 3                      | 6                | 2                  |
| DDT             | 7                      | 6                  | 5                      | 11               | 4                  |
| E2F-DP          | 10                     | 16                 | 8                      | 10               | 6                  |
| EIL             | 4                      | 6                  | 9                      | 11               | 4                  |
| ERF             | 182                    | 151                | 141                    | 229              | 100                |
| FAR1            | 86                     | 26                 | 28                     | 130              | 20                 |
| G2-like         | 53                     | 61                 | 53                     | 57               | 32                 |
| GeBP            | 9                      | 23                 | 11                     | 13               | 4                  |
| GNAT            | 45                     | 44                 | 44                     | 40               | 45                 |
| GRAS            | 83                     | 37                 | 54                     | 69               | 48                 |
| GRF             | 16                     | 9                  | 13                     | 19               | 9                  |
| HB              | 120                    | 118                | 105                    | 135              | 67                 |
| HMG             | 21                     | 23                 | 7                      | 14               | 10                 |
| HRT             | 2                      | 2                  | 1                      | 1                | 1                  |
| HSF             | 32                     | 25                 | 26                     | 38               | 18                 |
| IWS1            | 29                     | 12                 | 9                      | 22               | 7                  |
| Jumonji         | 19                     | 22                 | 20                     | 16               | 14                 |
| LFY             | 2                      | 1                  | 1                      | 2                | 1                  |
| LIM             | 21                     | 21                 | 15                     | 16               | 9                  |
| LOB             | 63                     | 50                 | 47                     | 39               | 34                 |
| LUG             | 8                      | 9                  | 5                      | 12               | 4                  |

|                |              |              |              |              |              |
|----------------|--------------|--------------|--------------|--------------|--------------|
| M-type         | 63           | 74           | 68           | 38           | 29           |
| MBF1           | 6            | 4            | 5            | 4            | 2            |
| MED6           | 1            | 2            | 2            | 1            | 1            |
| MED7           | 1            | 4            | 1            | 3            | 1            |
| MIKC           | 40           | 72           | 31           | 58           | 10           |
| mTERF          | 75           | 40           | 30           | 39           | 35           |
| MYB            | 202          | 160          | 139          | 124          | 61           |
| MYB-related    | 101          | 99           | 75           | 91           | 94           |
| NAC            | 179          | 137          | 101          | 170          | 95           |
| NF-X1          | 3            | 1            | 1            | 2            | –            |
| NF-YA          | 17           | 21           | 10           | 25           | 6            |
| NF-YB          | 23           | 27           | 27           | 16           | 14           |
| NF-YC          | 18           | 21           | 16           | 19           | 11           |
| NOZZLE         | 3            | 1            | 1            | –            | –            |
| OFP            | 23           | 17           | 24           | 31           | 16           |
| Orphans        | 85           | 99           | 72           | 91           | 114          |
| PHD            | 57           | 56           | 50           | 52           | 40           |
| PLATZ          | 19           | 15           | 21           | 21           | 11           |
| Pseudo ARR-B   | 7            | 7            | 5            | 14           | 6            |
| RAV            | 7            | 7            | 3            | 4            | 4            |
| RB             | 3            | 2            | 1            | 4            | 2            |
| Rcd1-like      | 3            | 3            | 13           | 5            | 3            |
| RWP-RK         | 15           | 17           | 10           | 15           | 10           |
| S1Fa-like      | 2            | 4            | 1            | 2            | 1            |
| SAP            | 2            | 1            | 2            | –            | 1            |
| SBP            | 29           | 30           | 17           | 29           | 15           |
| SET            | 53           | 55           | 48           | 46           | 33           |
| SNF2           | 42           | 59           | 62           | 54           | 34           |
| SOH1           | 2            | 2            | 1            | 3            | –            |
| SRS            | 12           | 16           | 9            | 6            | 5            |
| STAT           | 2            | 4            | 1            | 1            | 1            |
| SWI/SNF-BAF60b | 20           | 19           | 15           | 11           | 11           |
| SWI/SNF-SWI3   | 4            | 4            | 6            | 4            | 6            |
| TAZ            | 7            | 11           | 7            | 12           | 3            |
| TCP            | 35           | 33           | 36           | 23           | 22           |
| Tify           | 24           | 27           | 17           | 23           | 11           |
| TRAF           | 31           | 30           | 18           | 62           | 13           |
| Trihelix       | 52           | 31           | 25           | 36           | 27           |
| TUB            | 15           | 19           | 11           | 28           | 7            |
| ULT            | 4            | 3            | 3            | 2            | 2            |
| VOZ            | 3            | 3            | 2            | 2            | 1            |
| Whirly         | 3            | 4            | 2            | 2            | 2            |
| WRKY           | 112          | 90           | 81           | 128          | 58           |
| zf-HD          | 27           | 18           | 22           | 15           | 11           |
| <b>Total</b>   | <b>3,142</b> | <b>2,942</b> | <b>2,396</b> | <b>3,100</b> | <b>1,776</b> |

**Supplementary Table 9. Summary of number of disease resistance genes in *H. brasiliensis* and selected Euphorbiaceae genomes.**

| Type         | <i>H. brasiliensis</i> | <i>R. communis</i> | <i>M. esculenta</i> | <i>J. curcas</i> |
|--------------|------------------------|--------------------|---------------------|------------------|
| TIR-NBS      | 4                      | 7                  | 3                   | 15               |
| TIR-NBS-LRR  | 15                     | 25                 | 27                  | 40               |
| CC-NBS       | 35                     | 17                 | 15                  | 6                |
| CC-NBS-LRR   | 45                     | 21                 | 40                  | 19               |
| NBS-LRR      | 186                    | 67                 | 124                 | 91               |
| NBS          | 198                    | 95                 | 103                 | 104              |
| <b>Total</b> | <b>483</b>             | <b>232</b>         | <b>312</b>          | <b>275</b>       |

**Supplementary Table 10. Jasmonic acid, ethylene and salicylic acid receptor genes identified in *H. brasiliensis*.**

| <b>Gene name</b> | <b>Description</b>         | <b>Scaffold</b> | <b>Start</b> | <b>End</b> |
|------------------|----------------------------|-----------------|--------------|------------|
| <i>COII</i>      | Coronatine insensitive 1   | Scaffold5054    | 125,489      | 121,894    |
|                  |                            | Scaffold12564   | 63,741       | 68,657     |
| <i>ETR1</i>      | Ethylene receptor 1        | Scaffold949     | 142,689      | 130,105    |
|                  |                            | Scaffold4627    | 71,355       | 63,041     |
|                  |                            | Scaffold853     | 81,746       | 78,784     |
|                  |                            | Scaffold4375    | 95,628       | 82,405     |
| <i>NPR1</i>      | Nonexpresser of PR genes 1 | Scaffold322     | 157,862      | 161,990    |
|                  |                            | Scaffold5000    | 299,616      | 294,625    |
| <i>NPR3</i>      | Nonexpresser of PR genes 3 | Scaffold1409    | 143,759      | 139,510    |
|                  |                            | Scaffold5499    | 13,134       | 7,635      |
| <i>NPR4</i>      | Nonexpresser of PR genes 4 | Scaffold5203    | 33,116       | 2,5364     |

**Supplementary Table 11. Isoprenoid and rubber biosynthesis pathway genes in *H.***

*brasiliensis*.

a. Prenyl-PP biosynthesis

| <b>Gene name</b>                        | <b>EC No.</b> | <b>Scaffold</b> | <b>Start</b> | <b>End</b> |
|-----------------------------------------|---------------|-----------------|--------------|------------|
| Isopentenyl-diphosphate delta isomerase | 5.3.3.2       | Scaffold608     | 87,313       | 84,083     |
|                                         |               | Scaffold5686    | 92,855       | 89,702     |
| Dimethallyltransferase                  | 2.5.1.1       | Scaffold130     | 216,160      | 227,291    |
|                                         |               | Scaffold428     | 79,505       | 88,623     |
|                                         |               | Scaffold1842    | 147,630      | 151,997    |
| Farnesyl diphosphate synthase           | 2.5.1.10      | Scaffold72      | 136,310      | 131,621    |
|                                         |               | Scaffold11224   | 90,794       | 97,780     |
|                                         |               | Scaffold100414  | 9,395        | 16,712     |
| Geranyl geranyl diphosphate synthase    | 2.5.1.29      | Scaffold9       | 176,292      | 178,848    |
|                                         |               | Scaffold114     | 429,619      | 431,283    |
|                                         |               | Scaffold371     | 223,169      | 224,281    |
|                                         |               | Scaffold1948    | 44,864       | 45,595     |
|                                         |               | Scaffold2768    | 74,022       | 74,942     |
|                                         |               | Scaffold9780    | 49,412       | 48,291     |
|                                         |               | Scaffold10672   | 26,539       | 25,622     |
|                                         |               | Scaffold20367   | 62,971       | 48,270     |
|                                         |               | Scaffold115919  | 7,773        | 10,714     |
|                                         |               | Scaffold134789  | 179          | 606        |

b. MVA pathway

| <b>Gene name</b>       | <b>EC No.</b> | <b>Scaffold</b> | <b>Start</b> | <b>End</b> |
|------------------------|---------------|-----------------|--------------|------------|
| Pyruvate dehydrogenase | 1.2.4.1       | Scaffold1123    | 118,126      | 126,191    |
|                        |               | Scaffold1500    | 37,111       | 33,434     |
|                        |               | Scaffold1638    | 218,260      | 220,542    |
|                        |               | Scaffold3397    | 41,153       | 49,943     |
|                        |               | Scaffold6420    | 94,702       | 99,160     |
|                        |               | Scaffold27506   | 79,406       | 76,217     |

|                                                                                                   |          |                |         |         |
|---------------------------------------------------------------------------------------------------|----------|----------------|---------|---------|
|                                                                                                   |          | Scaffold116349 | 69,117  | 62,554  |
|                                                                                                   |          | Scaffold132840 | 70,448  | 68,595  |
| Dihydrolipoyllysine-residue<br>acetyltransferase component 1 of<br>pyruvate dehydrogenase complex | 2.3.1.12 | Scaffold800    | 193,988 | 205,764 |
| Dihydrolipoyllysine-residue<br>acetyltransferase component 2 of<br>pyruvate dehydrogenase complex |          | Scaffold2477   | 207,634 | 202,430 |
|                                                                                                   |          | Scaffold5306   | 118,413 | 124,137 |
| Dihydrolipoyllysine-residue<br>acetyltransferase component 4 of<br>pyruvate dehydrogenase complex |          | Scaffold110    | 335,675 | 340,558 |
|                                                                                                   |          | Scaffold3411   | 134,555 | 125,489 |
| Dihydrolipoyllysine-residue<br>acetyltransferase component 5 of<br>pyruvate dehydrogenase complex |          | Scaffold207    | 395,540 | 391,889 |
|                                                                                                   |          | Scaffold2876   | 220,022 | 223,402 |
| Dihydrolipoamide dehydrogenase                                                                    | 1.8.1.4  | Scaffold645    | 155,781 | 161,585 |
|                                                                                                   |          | Scaffold1723   | 78,933  | 73,703  |
|                                                                                                   |          | Scaffold2217   | 124,902 | 127,146 |
|                                                                                                   |          | Scaffold12305  | 64,155  | 73,997  |
| Acetyl-CoA acetyltransferase                                                                      | 2.3.1.9  | Scaffold184    | 62,774  | 65,426  |
|                                                                                                   |          | Scaffold377    | 152,548 | 163,126 |
|                                                                                                   |          | Scaffold613    | 149,270 | 144,049 |
|                                                                                                   |          | Scaffold795    | 232,731 | 242,156 |
| Hydroxymethylglutaryl coenzyme<br>A synthase                                                      | 2.3.3.10 | Scaffold3207   | 130,638 | 125311  |
|                                                                                                   |          | Scaffold107    | 316,217 | 318259  |
| Hydroxymethylglutaryl coenzyme<br>A reductase                                                     | 1.1.1.34 | Scaffold116    | 458,599 | 461,395 |
|                                                                                                   |          | Scaffold1153   | 94,187  | 89,398  |
|                                                                                                   |          | Scaffold4032   | 394,588 | 392,257 |
|                                                                                                   |          | Scaffold14497  | 101,170 | 98,081  |
|                                                                                                   |          | Scaffold142382 | 15,127  | 13,340  |
| Mevalonate kinase                                                                                 | 2.7.1.36 | Scaffold2042   | 88,233  | 84,287  |
|                                                                                                   |          | Scaffold35273  | 13,971  | 17,568  |
|                                                                                                   |          | Scaffold127194 | 2,993   | 981     |
| Phosphomevalonate kinase                                                                          | 2.7.4.2  | Scaffold2759   | 231,117 | 239,427 |

|                        |          |                |        |        |
|------------------------|----------|----------------|--------|--------|
|                        |          | Scaffold116349 | 55,899 | 49,762 |
| Mevalonate diphosphate | 4.1.1.33 | Scaffold539    | 56,841 | 63,613 |
| decarboxylase          |          | Scaffold721    | 48,364 | 54,235 |

c. MEP pathway

| <b>Gene name</b>                                         | <b>EC No.</b> | <b>Scaffold</b> | <b>Start</b> | <b>End</b> |
|----------------------------------------------------------|---------------|-----------------|--------------|------------|
| 1-deoxy-D-xylulose-5-phosphate synthase                  | 2.2.1.7       | Scaffold46      | 94,033       | 98,039     |
|                                                          |               | Scaffold2473    | 116,318      | 119,628    |
|                                                          |               | Scaffold3185    | 35,444       | 39,363     |
|                                                          |               | Scaffold5628    | 86,114       | 89,169     |
|                                                          |               | Scaffold12796   | 60,301       | 63,332     |
|                                                          |               | Scaffold19153   | 45,776       | 40,045     |
|                                                          |               | Scaffold21596   | 51,361       | 47,341     |
|                                                          |               | Scaffold62135   | 9,879        | 14,871     |
| 1-deoxy-D-xylulose 5-phosphate reductoisomerase          | 1.1.1.267     | Scaffold922     | 167,219      | 171,654    |
|                                                          |               | Scaffold7520    | 28,990       | 26,935     |
| 2-C-methyl-D-erythritol 4-phosphate cytidyltransferase   | 2.7.7.60      | Scaffold7576    | 144,747      | 139,268    |
|                                                          |               | Scaffold29142   | 12,579       | 18,607     |
| 4-(cytidine 5'-diphospho)-2-C-methyl-D-erythritol kinase | 2.7.1.148     | Scaffold453     | 177,164      | 182,850    |
|                                                          |               | Scaffold1975    | 44,319       | 42,012     |
| 2-C-methyl-D-erythritol 2,4-cyclodiphosphate synthase    | 4.6.1.12      | Scaffold2529    | 149,258      | 144,857    |
|                                                          |               | Scaffold177215  | 52,417       | 48,481     |
| 4-hydroxy-3-methylbut-2-en-1-yl diphosphate synthase     | 1.17.4.3      | Scaffold8       | 490,950      | 484,797    |
|                                                          |               | Scaffold29      | 308,139      | 311,196    |
| 4-hydroxy-3-methylbut-2-enyl diphosphate reductase       | 1.17.1.2      | Scaffold963     | 68,257       | 62,290     |
|                                                          |               | Scaffold159809  | 130,924      | 127,098    |

d. Rubber polymerization

| <b>Gene</b>  | <b>Description</b>                 | <b>Scaffold</b> | <b>Start</b> | <b>End</b> |
|--------------|------------------------------------|-----------------|--------------|------------|
| <i>CPT1</i>  | <i>cis</i> -Prenyltransferase      | Scaffold548     | 63,519       | 64,387     |
| <i>CPT2</i>  |                                    | Scaffold6070    | 25,320       | 24,430     |
| <i>CPT3</i>  |                                    | Scaffold313     | 92,897       | 92,007     |
| <i>CPT4</i>  |                                    | Scaffold313     | 138,258      | 137,156    |
| <i>CPT5</i>  |                                    | Scaffold548     | 45,869       | 46,662     |
| <i>CPT6</i>  |                                    | Scaffold120     | 677,195      | 678,316    |
| <i>CPT7</i>  |                                    | Scaffold1999    | 103,613      | 105,321    |
| <i>CPTL</i>  | <i>cis</i> -Prenyltransferase-like | Scaffold4659    | 115,978      | 112,945    |
| <i>SRPP1</i> | Small rubber particle protein      | Scaffold1741    | 118,276      | 119,728    |
| <i>SRPP2</i> |                                    | Scaffold617     | 194,088      | 192,536    |
| <i>SRPP3</i> |                                    | Scaffold24714   | 66,278       | 65,348     |
| <i>SRPP4</i> |                                    | Scaffold2078    | 182,116      | 183,686    |
| <i>SRPP5</i> |                                    | Scaffold635     | 143,390      | 144,689    |
| <i>SRPP6</i> |                                    | Scaffold345     | 85,056       | 83,759     |
| <i>SRPP7</i> |                                    | Scaffold1741    | 66,904       | 68,630     |
| <i>SRPP8</i> |                                    | Scaffold2016    | 44,014       | 45,040     |
| <i>REF1</i>  | Rubber elongation factor           | Scaffold111648  | 1,133        | 611        |
| <i>REF2</i>  |                                    | Scaffold149683  | 4,020        | 2,855      |
| <i>REF3</i>  |                                    | Scaffold1741    | 29,448       | 40,351     |
| <i>REF4</i>  |                                    | Scaffold345     | 62,894       | 61,530     |
| <i>REF5</i>  |                                    | Scaffold152868  | 20,703       | 21,280     |
| <i>REF6</i>  |                                    | Scaffold1741    | 124,249      | 125,273    |
| <i>REF7</i>  |                                    | Scaffold1741    | 144,098      | 145,403    |
| <i>REF8</i>  |                                    | Scaffold1741    | 73,698       | 74,881     |
| <i>REF9</i>  |                                    | Scaffold1741    | 17,312       | 19,523     |



**Supplementary Table 12. CAGE read mapping statistics.**

| <b>Sample</b> | <b>Cleaned reads</b> | <b>Mapped reads</b> | <b>Mapped reads (MapQ &gt;= 99%)</b> | <b>No. of TSS positions</b> |
|---------------|----------------------|---------------------|--------------------------------------|-----------------------------|
| Bark 1        | 34,133,792           | 8,533,449           | 4,297,529                            | 708,395                     |
| Bark 2        | 67,555,612           | 16,888,904          | 9,669,744                            | 1,305,412                   |
| Bark 3        | 68,164,388           | 17,041,098          | 8,851,884                            | 1,230,638                   |
| Latex 1       | 20,392,552           | 5,098,139           | 3,292,995                            | 465,411                     |
| Latex 2       | 58,093,928           | 14,523,483          | 9,150,459                            | 778,828                     |
| Leaf 1        | 97,993,704           | 24,498,427          | 18,016,471                           | 1,397,408                   |
| Leaf 2        | 57,648,544           | 14,412,137          | 10,629,899                           | 1,065,226                   |
| Leaf 3        | 79,898,692           | 19,974,674          | 15,285,261                           | 1,270,964                   |

Raw sequences were cleaned and adapter-trimmed using the TagDust2<sup>9</sup> program. The clean reads were mapped with BWA<sup>10</sup> to the *H. brasiliensis* genome and reads with mapping quality >= 99% were retained for further analysis.

**Supplementary Table 13. Location of CAGE transcription start site clusters (TSCs).**

| <b>Region category</b> | <b>No. of TSCs</b> |
|------------------------|--------------------|
| Upstream < 2,000 bp    | 10,786             |
| Inside gene            | 17,030             |
| Downstream < 500 bp    | 354                |
| Intergenic region      | 3,552              |

TSCs were defined using RECLU<sup>2</sup>, a pipeline that is used to discover reproducible TSSs and their alternative regulation from CAGE data.

**Supplementary Table 14. Enriched GO terms in latex-specific genes.**

| <b>Gene Ontology ID</b> | <b>Gene Ontology term</b>                | <b>Enrichment FDR</b> |
|-------------------------|------------------------------------------|-----------------------|
| GO:0005623              | Cell                                     | 5.03E-06              |
| GO:0044464              | Cell part                                | 5.03E-06              |
| GO:0005622              | Intracellular                            | 5.03E-06              |
| GO:0044424              | Intracellular part                       | 6.39E-06              |
| GO:0043229              | Intracellular organelle                  | 2.87E-04              |
| GO:0043226              | Organelle                                | 2.87E-04              |
| GO:0003677              | DNA binding                              | 6.64E-04              |
| GO:0043231              | Intracellular membrane-bounded organelle | 1.36E-03              |
| GO:0043227              | Membrane-bounded organelle               | 1.36E-03              |
| GO:0065007              | Biological regulation                    | 1.80E-03              |
| GO:0009058              | Biosynthetic process                     | 9.37E-03              |
| GO:0044699              | Single-organism process                  | 9.37E-03              |
| GO:0050789              | Regulation of biological process         | 1.08E-02              |
| GO:0044249              | Cellular biosynthetic process            | 1.11E-02              |
| GO:0005634              | Nucleus                                  | 1.32E-02              |
| GO:0010817              | Regulation of hormone levels             | 2.11E-02              |
| GO:1901576              | Organic substance biosynthetic process   | 2.29E-02              |
| GO:0012505              | Endomembrane system                      | 4.97E-02              |
| GO:0031177              | Phosphopantetheine binding               | 4.97E-02              |
| GO:0009889              | Regulation of biosynthetic process       | 4.97E-02              |

**Supplementary Table 15. Enriched GO terms in bark-specific genes.**

| <b>Gene Ontology ID</b> | <b>Gene Ontology term</b>                        | <b>Enrichment FDR</b> |
|-------------------------|--------------------------------------------------|-----------------------|
|                         | Transcription factor activity, sequence-specific |                       |
| GO:0003700              | DNA binding                                      | 2.05E-12              |
| GO:0006355              | Regulation of transcription, DNA-templated       | 4.86E-12              |
| GO:0005667              | Transcription factor complex                     | 1.69E-11              |
| GO:0005524              | ATP binding                                      | 2.39E-10              |
| GO:0003824              | Catalytic activity                               | 1.47E-07              |
| GO:0005886              | Plasma membrane                                  | 4.38E-07              |
| GO:0005634              | Nucleus                                          | 1.68E-06              |
| GO:0016021              | Integral component of membrane                   | 1.15E-05              |
| GO:0010075              | Regulation of meristem growth                    | 3.94E-05              |
| GO:0043565              | Sequence-specific DNA binding                    | 5.43E-05              |
| GO:1901700              | Response to oxygen-containing compound           | 1.40E-04              |
| GO:0071555              | Cell wall organization                           | 1.97E-04              |
| GO:0009505              | Plant-type cell wall                             | 2.08E-04              |
| GO:0009855              | Determination of bilateral symmetry              | 3.08E-04              |
| GO:0010089              | Xylem development                                | 3.62E-04              |
| GO:0003682              | Chromatin binding                                | 4.36E-04              |
| GO:0044765              | Single-organism transport                        | 7.45E-04              |
|                         | Polygalacturonate 4-alpha-                       |                       |
| GO:0047262              | galacturonosyltransferase activity               | 8.76E-04              |
| GO:0006950              | Response to stress                               | 1.08E-03              |
| GO:0009944              | Polarity specification of adaxial/ abaxial axis  | 1.10E-03              |
| GO:0005215              | Transporter activity                             | 1.10E-03              |
| GO:0045489              | Pectin biosynthetic process                      | 1.19E-03              |
| GO:0009416              | Response to light stimulus                       | 1.19E-03              |
| GO:0009506              | Plasmodesma                                      | 1.19E-03              |
| GO:0005985              | Sucrose metabolic process                        | 1.25E-03              |
| GO:0048439              | Flower morphogenesis                             | 1.48E-03              |
| GO:0048519              | Negative regulation of biological process        | 1.48E-03              |
| GO:0006468              | Protein phosphorylation                          | 1.49E-03              |
| GO:0046983              | Protein dimerization activity                    | 1.50E-03              |

---

|            |                                               |          |
|------------|-----------------------------------------------|----------|
| GO:0042623 | ATPase activity, coupled                      | 1.57E-03 |
| GO:0010014 | Meristem initiation                           | 1.66E-03 |
| GO:0016051 | Carbohydrate biosynthetic process             | 1.82E-03 |
| GO:0005976 | Polysaccharide metabolic process              | 2.99E-03 |
| GO:0048608 | Reproductive structure development            | 3.47E-03 |
| GO:0000785 | Chromatin                                     | 3.56E-03 |
| GO:0010638 | Positive regulation of organelle organization | 3.82E-03 |
| GO:0005509 | Calcium ion binding                           | 4.00E-03 |
| GO:0032535 | Regulation of cellular component size         | 4.61E-03 |
|            | Energy derivation by oxidation of organic     |          |
| GO:0015980 | compounds                                     | 4.74E-03 |
| GO:0009605 | Response to external stimulus                 | 4.94E-03 |
| GO:0071229 | Cellular response to acid chemical            | 5.25E-03 |
| GO:0071396 | Cellular response to lipid                    | 6.09E-03 |
| GO:0010026 | Trichome differentiation                      | 6.35E-03 |
| GO:0009755 | Hormone-mediated signaling pathway            | 7.01E-03 |
| GO:0019752 | Carboxylic acid metabolic process             | 7.24E-03 |
| GO:1901564 | Organonitrogen compound metabolic process     | 7.57E-03 |
| GO:0005982 | Starch metabolic process                      | 7.75E-03 |
| GO:0009630 | Gravitropism                                  | 7.75E-03 |

---

**Supplementary Table 16. Enriched GO terms in leaf-specific genes.**

| <b>Gene Ontology ID</b> | <b>Gene Ontology term</b>                               | <b>Enrichment FDR</b> |
|-------------------------|---------------------------------------------------------|-----------------------|
| GO:0009535              | Chloroplast thylakoid membrane                          | 2.76E-22              |
| GO:0009570              | Chloroplast stroma                                      | 8.67E-15              |
| GO:0006098              | Pentose-phosphate shunt                                 | 5.00E-12              |
| GO:0009941              | Chloroplast envelope                                    | 8.78E-12              |
| GO:0009523              | Photosystem II                                          | 4.00E-11              |
| GO:0016168              | Chlorophyll binding                                     | 7.88E-11              |
| GO:0018298              | Protein-chromophore linkage                             | 7.17E-10              |
| GO:0003682              | Chromatin binding                                       | 2.07E-09              |
| GO:0009522              | Photosystem I                                           | 2.33E-09              |
| GO:0000785              | Chromatin                                               | 2.68E-09              |
| GO:0009765              | Photosynthesis, light harvesting                        | 1.93E-08              |
| GO:0009902              | Chloroplast relocation                                  | 3.62E-08              |
| GO:0003677              | DNA binding                                             | 8.47E-08              |
| GO:0005634              | Nucleus                                                 | 1.07E-07              |
| GO:0006364              | rRNA processing                                         | 1.54E-07              |
| GO:0010218              | Response to far red light                               | 3.08E-07              |
| GO:0010207              | Photosystem II assembly                                 | 3.66E-07              |
|                         | Isopentenyl diphosphate biosynthetic process,           |                       |
| GO:0019288              | Methylerythritol 4-phosphate pathway                    | 6.03E-07              |
| GO:0035304              | Regulation of protein dephosphorylation                 | 6.06E-07              |
| GO:0010027              | Thylakoid membrane organization                         | 6.97E-07              |
| GO:0048038              | Quinone binding                                         | 7.24E-07              |
| GO:0010228              | Vegetative to reproductive phase transition of meristem | 8.88E-07              |
| GO:0009637              | Response to blue light                                  | 2.88E-06              |
| GO:0010114              | Response to red light                                   | 4.02E-06              |
| GO:0015976              | Carbon utilization                                      | 4.02E-06              |
| GO:0010319              | Stromule                                                | 4.11E-06              |
| GO:0015995              | Chlorophyll biosynthetic process                        | 8.93E-06              |
| GO:0009773              | Photosynthetic electron transport in photosystem I      | 1.38E-05              |
| GO:0010155              | Regulation of proton transport                          | 2.90E-05              |
|                         | Systemic acquired resistance, salicylic acid mediated   |                       |
| GO:0009862              | signaling pathway                                       | 6.43E-05              |
| GO:0005667              | Transcription factor complex                            | 8.43E-05              |
| GO:0042744              | Hydrogen peroxide catabolic process                     | 9.49E-05              |
| GO:0048046              | Apoplast                                                | 1.20E-04              |
| GO:0033554              | Cellular response to stress                             | 1.27E-04              |
| GO:0016757              | Transferase activity, transferring glycosyl groups      | 1.83E-04              |
| GO:0015937              | Coenzyme A biosynthetic process                         | 2.77E-04              |
| GO:0042793              | Transcription from plastid promoter                     | 2.78E-04              |
| GO:0019344              | Cysteine biosynthetic process                           | 2.80E-04              |
| GO:0015986              | ATP synthesis coupled proton transport                  | 2.89E-04              |
| GO:0045893              | Positive regulation of transcription, DNA-templated     | 3.07E-04              |
| GO:0006417              | Regulation of translation                               | 3.11E-04              |
| GO:0044272              | Sulfur compound biosynthetic process                    | 3.32E-04              |
| GO:0016117              | Carotenoid biosynthetic process                         | 3.82E-04              |
|                         | Transcription factor activity, sequence-specific DNA    |                       |
| GO:0003700              | binding                                                 | 4.19E-04              |

---

|            |                                                                                                                      |          |
|------------|----------------------------------------------------------------------------------------------------------------------|----------|
| GO:0016021 | Integral component of membrane                                                                                       | 4.73E-04 |
| GO:0009965 | Leaf morphogenesis                                                                                                   | 5.67E-04 |
| GO:0015078 | Hydrogen ion transmembrane transporter activity                                                                      | 5.90E-04 |
| GO:0010035 | Response to inorganic substance                                                                                      | 5.92E-04 |
| GO:0006563 | L-serine metabolic process                                                                                           | 6.29E-04 |
| GO:0009867 | Jasmonic acid mediated signaling pathway                                                                             | 6.29E-04 |
| GO:0008266 | Poly(U) RNA binding                                                                                                  | 6.71E-04 |
| GO:0030154 | Cell differentiation                                                                                                 | 7.09E-04 |
| GO:0006636 | Unsaturated fatty acid biosynthetic process                                                                          | 1.02E-03 |
| GO:0072330 | Monocarboxylic acid biosynthetic process                                                                             | 1.02E-03 |
| GO:0016226 | Iron-sulfur cluster assembly                                                                                         | 1.24E-03 |
| GO:0035639 | Purine ribonucleoside triphosphate binding                                                                           | 1.56E-03 |
| GO:0019321 | Pentose metabolic process                                                                                            | 1.60E-03 |
|            | Electron transporter, transferring electrons within the cyclic electron transport pathway of photosynthesis activity |          |
| GO:0045156 |                                                                                                                      | 1.65E-03 |
| GO:0031348 | Negative regulation of defense response                                                                              | 1.74E-03 |
| GO:0005739 | Mitochondrion                                                                                                        | 1.81E-03 |
| GO:0006566 | Threonine metabolic process                                                                                          | 1.82E-03 |
| GO:0050136 | NADH dehydrogenase (quinone) activity                                                                                | 2.33E-03 |
| GO:0006546 | Glycine catabolic process                                                                                            | 2.35E-03 |
| GO:0009743 | Response to carbohydrate                                                                                             | 2.38E-03 |
| GO:0005509 | Calcium ion binding                                                                                                  | 2.58E-03 |
| GO:0048481 | Ovule development                                                                                                    | 2.65E-03 |
| GO:0010310 | Regulation of hydrogen peroxide metabolic process                                                                    | 2.96E-03 |
| GO:0046983 | Protein dimerization activity                                                                                        | 2.99E-03 |
| GO:0010154 | Fruit development                                                                                                    | 3.48E-03 |
| GO:0010158 | Abaxial cell fate specification                                                                                      | 4.33E-03 |
| GO:0021700 | Developmental maturation                                                                                             | 4.35E-03 |
| GO:0006096 | Glycolytic process                                                                                                   | 4.73E-03 |
| GO:0006094 | Gluconeogenesis                                                                                                      | 4.87E-03 |
| GO:0009651 | Response to salt stress                                                                                              | 4.91E-03 |
| GO:0009908 | Flower development                                                                                                   | 4.99E-03 |
| GO:0005840 | Ribosome                                                                                                             | 5.38E-03 |
| GO:0045259 | Proton-transporting ATP synthase complex                                                                             | 5.72E-03 |
| GO:0030001 | Metal ion transport                                                                                                  | 6.66E-03 |
| GO:0009084 | Glutamine family amino acid biosynthetic process                                                                     | 6.84E-03 |
| GO:0042773 | ATP synthesis coupled electron transport oxidoreductase activity, acting on CH-OH group of donors                    | 6.93E-03 |
| GO:0016614 |                                                                                                                      | 6.93E-03 |
| GO:0008135 | Translation factor activity, RNA binding                                                                             | 7.62E-03 |
| GO:0032403 | Protein complex binding                                                                                              | 8.04E-03 |
| GO:0016874 | Ligase activity                                                                                                      | 8.23E-03 |
| GO:0005215 | Transporter activity                                                                                                 | 8.28E-03 |
| GO:0015977 | Carbon fixation                                                                                                      | 8.53E-03 |
| GO:0032549 | Ribonucleoside binding                                                                                               | 8.61E-03 |
| GO:0010264 | Myo-inositol hexakisphosphate biosynthetic process                                                                   | 8.64E-03 |
| GO:0006099 | Tricarboxylic acid cycle                                                                                             | 9.02E-03 |
| GO:1901617 | Organic hydroxy compound biosynthetic process                                                                        | 9.71E-03 |

---

## References

1. Lespinasse, D. *et al.* A saturated genetic linkage map of rubber tree (*Hevea* spp.) based on RFLP, AFLP, microsatellite, and isozyme markers. *Theor. Appl. Genet.* **100**, 127-138 (2000).
2. Ohmiya, H. *et al.* RECLU: a pipeline to discover reproducible transcriptional start sites and their alternative regulation using capped analysis of gene expression (CAGE). *BMC Genomics* **15**, 269 (2014).
3. Chow, K.-S., Ghazali, A.-K., Hoh, C.-C. & Mohd-Zainuddin, Z. RNA sequencing read depth requirement for optimal transcriptome coverage in *Hevea brasiliensis*. *BMC Res. Notes* **7**, 69 (2014).
4. Rahman, A.Y. *et al.* Draft genome sequence of the rubber tree *Hevea brasiliensis*. *BMC Genomics* **14**, 75 (2013).
5. Xia, Z. *et al.* RNA-Seq analysis and *de novo* transcriptome assembly of *Hevea brasiliensis*. *Plant Mol. Biol.* **77**, 299-308 (2011).
6. Li, D., Deng, Z., Qin, B., Liu, X. & Men, Z. *De novo* assembly and characterization of bark transcriptome using Illumina sequencing and development of EST-SSR markers in rubber tree (*Hevea brasiliensis* Muell. Arg.). *BMC Genomics* **13**, 192 (2012).
7. Triwitayakorn, K. *et al.* Transcriptome sequencing of *Hevea brasiliensis* for development of microsatellite markers and construction of a genetic linkage map. *DNA Research: An International Journal for Rapid Publication of Reports on Genes and Genomes* **18**, 471-482 (2011).
8. Schulz, M.H., Zerbino, D.R., Vingron, M. & Birney, E. Oases: robust *de novo* RNA-seq assembly across the dynamic range of expression levels. *Bioinformatics* **28**, 1086-1092 (2012).



9. Lassmann, T. TagDust2: a generic method to extract reads from sequencing data. *BMC Bioinformatics* **16**, 1-8 (2015).
10. Li, H. & Durbin, R. Fast and accurate short read alignment with Burrows–Wheeler transform. *Bioinformatics* **25**, 1754-1760 (2009).
